# Supplementary material for: Properties and gene expression profiling of acquired radioresistance in mouse breast cancer cells
Source: PubMed Central journal article supplement — Ann Transl Med. 2021 Apr;9(8):628. doi: 10.21037/atm-20-4667 (PMC8106033; doi:10.21037/atm-20-4667), 2021-04
Supplement: atm-09-08-628-dss.pdf [file atm-09-08-628-dss.pdf]

## Data Sharing Statement

|                     |                                                                                                                                                    |                                                                                                                                 |
|---------------------|----------------------------------------------------------------------------------------------------------------------------------------------------|---------------------------------------------------------------------------------------------------------------------------------|
| <b>Article Info</b> | <a href="http://dx.doi.org/10.21037/atm-20-4667">http://dx.doi.org/10.21037/atm-20-4667</a>                                                        |                                                                                                                                 |
| <b>Item</b>         | <b>Question</b>                                                                                                                                    | <b>Authors' Response</b><br>(place "-" if not applicable)                                                                       |
| 1                   | Would you like to share data collected for your study to others?                                                                                   | Yes.                                                                                                                            |
| 2                   | If not, would you like to share the reason for your decision?                                                                                      | -                                                                                                                               |
| 3                   | What data in particular will be shared?                                                                                                            | Every data will also be shared if requested.                                                                                    |
| 4                   | Any other documents will be share? Such as study protocol, statistical analysis plan, informed consent form, clinical study report, analytic code. | Statistical analysis plan, informed consent form.                                                                               |
| 5                   | When will data availability begin?                                                                                                                 | From the publication date.                                                                                                      |
| 6                   | When will data availability end?                                                                                                                   | Two years within the publication date, since the technique or another things may be updated over time                           |
| 7                   | To whom will you share the data?                                                                                                                   | Everyone of reader who interested in studies of Radioresistance.                                                                |
| 8                   | For what type of analysis or purpose?                                                                                                              | For analysis to evaluate the safety of Radioresistance in breast cancer patients.                                               |
| 9                   | How or where can the data/documents be obtained?                                                                                                   | Emails could be sent to the address below to obtain the shared data: c3024034@163.com (C. Guodong) or hanw@hfcas.ac.cn (W. Han) |
| 10                  | Any other restrictions?                                                                                                                            | We may balance the potential benefits and risks for each request and then provide the data that could be shared.                |
