# Supplementary material for: Properties and gene expression profiling of acquired radioresistance in mouse breast cancer cells
Source: PubMed Central journal article supplement — Ann Transl Med. 2021 Apr;9(8):628. doi: 10.21037/atm-20-4667 (PMC8106033; doi:10.21037/atm-20-4667), 2021-04
Supplement: atm-09-08-628-supplementary.pdf [file atm-09-08-628-supplementary.pdf]

**Supplementary Table 1. List of the differentially expressed genes (DEGs) in NF639R cells vs. NF639 cells**

| Gene ID             | Gene Symbol   | MeanTPM<br>(NF639R) | MeanTPM<br>(NF639) | log <sub>2</sub> FoldChange | p-value     | q-value     | Result | Gene Description                                                                                  |
|---------------------|---------------|---------------------|--------------------|-----------------------------|-------------|-------------|--------|---------------------------------------------------------------------------------------------------|
| ENSMUSG00000078915  | Hsp25-ps1     | 6.641855            | 0.000824333        | 12.97607077                 | 2.38E-11    | 1.27E-09    | up     | heat shock protein 25, pseudogene 1 [Source:MGI Symbol;Acc:MGI:96241]                             |
| ENSMUSG000000031379 | Pir           | 7.332141            | 0.043030667        | 7.412725528                 | 1.19E-09    | 4.67E-08    | up     | pirin [Source:MGI Symbol;Acc:MGI:1916906]                                                         |
| ENSMUSG000000031980 | Agt           | 32.483909           | 0.434484333        | 6.224277284                 | 1.52E-147   | 1.19E-143   | up     | angiotensinogen (serpin peptidase inhibitor, clade A, member 8) [Source:MGI Symbol;Acc:MGI:87963] |
| ENSMUSG000000027375 | Mal           | 7.743187667         | 0.275256333        | 4.814079944                 | 5.66E-63    | 7.40E-60    | up     | myelin and lymphocyte protein, T cell differentiation protein [Source:MGI Symbol;Acc:MGI:892970]  |
| ENSMUSG000000000753 | Serpinf1      | 135.1986237         | 5.409637667        | 4.643404688                 | 2.41E-200   | 3.77E-196   | up     | serine (or cysteine) peptidase inhibitor, clade F, member 1 [Source:MGI Symbol;Acc:MGI:108080]    |
| ENSMUSG000000036908 | Unc93b1       | 5.739695333         | 0.254224           | 4.49680202                  | 0.000207731 | 0.001892764 | up     | unc-93 homolog B1, TLR signaling regulator [Source:MGI Symbol;Acc:MGI:1859307]                    |
| ENSMUSG000000050896 | Rtn4rl2       | 9.2162              | 0.421229           | 4.451495356                 | 4.09E-40    | 1.73E-37    | up     | reticulon 4 receptor-like 2 [Source:MGI Symbol;Acc:MGI:2669796]                                   |
| ENSMUSG000000029755 | Dlx5          | 16.326984           | 0.820884           | 4.313936136                 | 2.92E-65    | 4.58E-62    | up     | distal-less homeobox 5 [Source:MGI Symbol;Acc:MGI:101926]                                         |
| ENSMUSG000000019102 | Aldh3a1       | 222.322291          | 12.196711          | 4.188088542                 | 3.05E-77    | 7.97E-74    | up     | aldehyde dehydrogenase family 3, subfamily A1 [Source:MGI Symbol;Acc:MGI:1353451]                 |
| ENSMUSG000000029771 | Irf5          | 5.343041333         | 0.368494333        | 3.857946839                 | 9.79E-38    | 3.65E-35    | up     | interferon regulatory factor 5 [Source:MGI Symbol;Acc:MGI:1350924]                                |
| ENSMUSG000000025855 | Prkar1b       | 12.06690833         | 0.916271333        | 3.719137396                 | 4.40E-49    | 3.45E-46    | up     | protein kinase, cAMP dependent regulatory, type I beta [Source:MGI Symbol;Acc:MGI:97759]          |
| ENSMUSG000000038296 | Galnt18       | 12.22789167         | 0.935416667        | 3.708422732                 | 1.15E-61    | 1.29E-58    | up     | polypeptide N-acetylglucosaminyltransferase 18 [Source:MGI Symbol;Acc:MGI:2446239]                |
| ENSMUSG000000020866 | Caena1g       | 6.006289            | 0.478120667        | 3.651027221                 | 3.72E-50    | 3.07E-47    | up     | calcium channel, voltage-dependent, T type, alpha 1G subunit [Source:MGI Symbol;Acc:MGI:1201678]  |
| ENSMUSG000000007594 | Hapln4        | 7.589206333         | 0.647827           | 3.550268516                 | 6.53E-65    | 9.31E-62    | up     | hyaluronan and proteoglycan link protein 4 [Source:MGI Symbol;Acc:MGI:2679531]                    |
| ENSMUSG000000026725 | Tnn           | 72.214249           | 6.837737333        | 3.400692623                 | 5.11E-14    | 4.09E-12    | up     | tenascin N [Source:MGI Symbol;Acc:MGI:2665790]                                                    |
| ENSMUSG000000006800 | Sulf2         | 7.381699333         | 0.761820333        | 3.276430276                 | 5.66E-46    | 3.41E-43    | up     | sulfatase 2 [Source:MGI Symbol;Acc:MGI:1919293]                                                   |
| ENSMUSG000000020432 | Tcn2          | 5.281788            | 0.585042667        | 3.174412648                 | 6.38E-17    | 7.14E-15    | up     | transcobalamin 2 [Source:MGI Symbol;Acc:MGI:98534]                                                |
| ENSMUSG000000017417 | Pldc1         | 5.266995            | 0.598958667        | 3.136451737                 | 1.01E-35    | 3.44E-33    | up     | plexin domain containing 1 [Source:MGI Symbol;Acc:MGI:1919574]                                    |
| ENSMUSG000000041559 | Fmod          | 8.717799667         | 1.020834           | 3.094215766                 | 8.65E-42    | 3.99E-39    | up     | fibromodulin [Source:MGI Symbol;Acc:MGI:1328364]                                                  |
| ENSMUSG000000030218 | Mgp           | 196.03569           | 24.38868233        | 3.006832614                 | 3.03E-77    | 7.97E-74    | up     | matrix Gla protein [Source:MGI Symbol;Acc:MGI:96976]                                              |
| ENSMUSG000000039137 | Whrn          | 8.232785667         | 1.037170667        | 2.988727358                 | 5.20E-28    | 1.29E-25    | up     | whirlin [Source:MGI Symbol;Acc:MGI:2682003]                                                       |
| ENSMUSG000000050751 | Pgbd5         | 6.414797667         | 0.855392667        | 2.906745017                 | 6.86E-38    | 2.62E-35    | up     | piggyBac transposable element derived 5 [Source:MGI Symbol;Acc:MGI:2429955]                       |
| ENSMUSG000000092130 | D030025P21Rik | 18.60276            | 2.489806           | 2.901411443                 | 1.68E-47    | 1.20E-44    | up     | RIKEN cDNA D030025P21 gene [Source:MGI Symbol;Acc:MGI:3698049]                                    |
| ENSMUSG000000096965 | 3300005D01Rik | 28.81078933         | 3.976952333        | 2.856874011                 | 1.24E-40    | 5.40E-38    | up     | RIKEN cDNA 3300005D01 gene [Source:MGI Symbol;Acc:MGI:1925762]                                    |
| ENSMUSG000000088529 | Gm26083       | 5.141384333         | 0.758241333        | 2.761427854                 | 0.011654677 | 0.047864805 | up     | predicted gene, 26083 [Source:MGI Symbol;Acc:MGI:5455860]                                         |
| ENSMUSG000000021846 | Peli2         | 11.054688           | 1.753172333        | 2.656618586                 | 5.62E-74    | 1.26E-70    | up     | pellino 2 [Source:MGI Symbol;Acc:MGI:1891445]                                                     |
| ENSMUSG000000000567 | Sox9          | 11.558805           | 1.84218            | 2.649506314                 | 2.33E-54    | 2.29E-51    | up     | SRY (sex determining region Y)-box 9 [Source:MGI Symbol;Acc:MGI:98371]                            |

|                     |               |             |             |             |             |            |    |                                                                                                                    |
|---------------------|---------------|-------------|-------------|-------------|-------------|------------|----|--------------------------------------------------------------------------------------------------------------------|
| ENSMUSG00000097312  | Gm26870       | 8.28511667  | 1.322407    | 2.647354876 | 1.21E-11    | 6.89E-10   | up | predicted gene, 26870 [Source: MGI Symbol; ACC:MGI:5477364]                                                        |
| ENSMUSG00000023911  | Flywch2       | 8.23317     | 1.366677    | 2.590775698 | 9.82E-13    | 6.63E-11   | up | FLYWCH family member 2 [Source:MGI Symbol;Acc:MGI:1924167]                                                         |
| ENSMUSG00000022610  | Mapk12        | 22.075716   | 3.822503    | 2.529870692 | 9.83E-40    | 4.05E-37   | up | mitogen-activated protein kinase 12 [Source:MGI Symbol;Acc:MGI:1353438]                                            |
| ENSMUSG00000036565  | Ttyh3         | 120.7323153 | 21.22508033 | 2.507969962 | 8.96E-107   | 3.51E-103  | up | tweety family member 3 [Source:MGI Symbol;Acc:MGI:1925589]                                                         |
| ENSMUSG00000023411  | Nfate4        | 37.31176367 | 6.629898333 | 2.492571903 | 1.15E-61    | 1.29E-58   | up | nuclear factor of activated T cells, cytoplasmic, calcineurin dependent 4 [Source:MGI Symbol;Acc:MGI:1920431]      |
| ENSMUSG00000051483  | Cbr1          | 34.43288567 | 6.131562    | 2.489460543 | 1.73E-46    | 1.13E-43   | up | carbonyl reductase 1 [Source:MGI Symbol;Acc:MGI:88284]                                                             |
| ENSMUSG00000033227  | Wnt6          | 13.869975   | 2.471828333 | 2.48831473  | 1.07E-45    | 6.21E-43   | up | wingless-type MMTV integration site family, member 6 [Source:MGI Symbol;Acc:MGI:98960]                             |
| ENSMUSG00000075014  | Gm10800       | 19.870986   | 3.644427333 | 2.446899421 | 1.52E-12    | 9.93E-11   | up | predicted gene 10800 [Source:MGI Symbol;Acc:MGI:3641657]                                                           |
| ENSMUSG00000074738  | Fndc10        | 12.40600633 | 2.324619667 | 2.415972167 | 3.23E-33    | 1.01E-30   | up | fibronectin type III domain containing 10 [Source:MGI Symbol;Acc:MGI:2444790]                                      |
| ENSMUSG00000032024  | Clmp          | 12.44799133 | 2.386173667 | 2.383142009 | 1.35E-34    | 4.49E-32   | up | CXADR-like membrane protein [Source:MGI Symbol;Acc:MGI:1918816]                                                    |
| ENSMUSG00000078923  | Ube2v1        | 157.0365683 | 30.350148   | 2.371325095 | 0.008774881 | 0.03843486 | up | ubiquitin-conjugating enzyme E2 variant 1 [Source:MGI Symbol;Acc:MGI:1913839]                                      |
| ENSMUSG00000036256  | Igfbp7        | 205.3354693 | 41.247968   | 2.315587903 | 2.59E-71    | 5.08E-68   | up | insulin-like growth factor binding protein 7 [Source:MGI Symbol;Acc:MGI:1352480]                                   |
| ENSMUSG00000003849  | Nqo1          | 214.1784107 | 43.78333833 | 2.290359198 | 2.42E-44    | 1.23E-41   | up | NAD(P)H dehydrogenase, quinone 1 [Source:MGI Symbol;Acc:MGI:103187]                                                |
| ENSMUSG00000010307  | Tmem86a       | 7.797578333 | 1.608864667 | 2.276983165 | 3.27E-21    | 5.52E-19   | up | transmembrane protein 86A [Source:MGI Symbol;Acc:MGI:1915143]                                                      |
| ENSMUSG00000021469  | Msx2          | 7.941234667 | 1.646082667 | 2.270326538 | 1.73E-25    | 3.81E-23   | up | msh homeobox 2 [Source:MGI Symbol;Acc:MGI:97169]                                                                   |
| ENSMUSG000000037161 | Mgarp         | 7.965402667 | 1.663871333 | 2.25920342  | 6.46E-15    | 5.89E-13   | up | mitochondria localized glutamic acid rich protein [Source:MGI Symbol;Acc:MGI:1914999]                              |
| ENSMUSG00000053137  | Mapk11        | 13.65592967 | 2.86622     | 2.252306278 | 3.86E-26    | 8.76E-24   | up | mitogen-activated protein kinase 11 [Source:MGI Symbol;Acc:MGI:1338024]                                            |
| ENSMUSG00000022871  | Fetub         | 7.47345     | 1.592268    | 2.230691213 | 3.44E-17    | 4.00E-15   | up | fetuin beta [Source:MGI Symbol;Acc:MGI:1890221]                                                                    |
| ENSMUSG00000046329  | Slc25a23      | 5.3272      | 1.195258333 | 2.156054981 | 1.28E-16    | 1.39E-14   | up | solute carrier family 25 (mitochondrial carrier; phosphate carrier), member 23 [Source:MGI Symbol;Acc:MGI:1914222] |
| ENSMUSG00000026043  | Col3a1        | 110.3138403 | 24.78804133 | 2.153897623 | 7.01E-27    | 1.66E-24   | up | collagen, type III, alpha 1 [Source:MGI Symbol;Acc:MGI:88453]                                                      |
| ENSMUSG00000031654  | Cbln1         | 12.453142   | 2.888374333 | 2.108180156 | 1.08E-24    | 2.20E-22   | up | cerebellin 1 precursor protein [Source:MGI Symbol;Acc:MGI:88281]                                                   |
| ENSMUSG00000029093  | Sorcs2        | 8.197764    | 1.930482333 | 2.086269106 | 2.27E-21    | 3.95E-19   | up | sortilin-related VPS10 domain containing receptor 2 [Source:MGI Symbol;Acc:MGI:1932289]                            |
| ENSMUSG00000045763  | Basp1         | 68.579206   | 16.15143367 | 2.086108971 | 3.29E-60    | 3.43E-57   | up | brain abundant, membrane attached signal protein 1 [Source:MGI Symbol;Acc:MGI:1917600]                             |
| ENSMUSG00000002020  | Ltbp2         | 28.84893633 | 6.819129667 | 2.080858604 | 5.40E-46    | 3.38E-43   | up | latent transforming growth factor beta binding protein 2 [Source:MGI Symbol;Acc:MGI:99502]                         |
| ENSMUSG00000079547  | H2-DMb1       | 9.625615    | 2.302110333 | 2.063921741 | 2.38E-18    | 3.11E-16   | up | histocompatibility 2, class II, locus Mb1 [Source:MGI Symbol;Acc:MGI:95922]                                        |
| ENSMUSG000000041577 | Prelp         | 22.92736633 | 5.633394    | 2.02499436  | 1.31E-16    | 1.41E-14   | up | proline arginine-rich end leucine-rich repeat [Source:MGI Symbol;Acc:MGI:2151110]                                  |
| ENSMUSG00000042485  | Mustn1        | 10.30200633 | 2.563343667 | 2.006826514 | 7.61E-16    | 7.75E-14   | up | musculoskeletal, embryonic nuclear protein 1 [Source:MGI Symbol;Acc:MGI:1913425]                                   |
| ENSMUSG00000063838  | 1700027J19Rik | 27.79249133 | 6.920862    | 2.005671521 | 1.31E-22    | 2.38E-20   | up | CDC42 effector protein (Rho GTPase binding) 5 [Source:MGI Symbol;Acc:MGI:1929745]                                  |
| ENSMUSG00000029869  | Ephb6         | 23.15419267 | 5.827081333 | 1.990428102 | 3.70E-45    | 2.07E-42   | up | Eph receptor B6 [Source:MGI Symbol;Acc:MGI:1096338]                                                                |
| ENSMUSG00000062713  | Sim2          | 5.278587    | 1.335961667 | 1.982273181 | 4.46E-15    | 4.18E-13   | up | single-minded family bHLH transcription factor 2 [Source:MGI Symbol;Acc:MGI:98307]                                 |

|                    |            |             |             |             |             |             |    |                                                                                                                                      |
|--------------------|------------|-------------|-------------|-------------|-------------|-------------|----|--------------------------------------------------------------------------------------------------------------------------------------|
| ENSMUSG00000026888 | Grb14      | 12.39601333 | 3.171246667 | 1.966754209 | 8.58E-25    | 1.77E-22    | up | growth factor receptor bound protein 14 [Source:MGI Symbol;Acc:MGI:1355324]                                                          |
| ENSMUSG00000051048 | P4ha3      | 8.090161333 | 2.129716333 | 1.925507189 | 5.54E-14    | 4.41E-12    | up | procollagen-proline, 2-oxoglutarate 4-dioxygenase (proline 4-hydroxylase), alpha polypeptide III [Source:MGI Symbol;Acc:MGI:2444049] |
| ENSMUSG00000056427 | Slit3      | 10.251743   | 2.800709333 | 1.872005049 | 2.85E-25    | 6.12E-23    | up | slit guidance ligand 3 [Source:MGI Symbol;Acc:MGI:1315202]                                                                           |
| ENSMUSG00000024663 | Rab3il1    | 28.64123333 | 7.828505    | 1.871284889 | 6.13E-29    | 1.55E-26    | up | RAB3A interacting protein (rabin3)-like 1 [Source:MGI Symbol;Acc:MGI:1922010]                                                        |
| ENSMUSG00000026177 | Slc11a1    | 5.200648333 | 1.428625    | 1.864064214 | 1.08E-16    | 1.19E-14    | up | solute carrier family 11 (proton-coupled divalent metal ion transporters), member 1 [Source:MGI Symbol;Acc:MGI:1345275]              |
| ENSMUSG00000000253 | Gmpr       | 12.969357   | 3.596656667 | 1.850378602 | 5.77E-18    | 7.23E-16    | up | guanosine monophosphate reductase [Source:MGI Symbol;Acc:MGI:1913605]                                                                |
| ENSMUSG00000048416 | Mifl       | 5.417339667 | 1.503731667 | 1.849037402 | 1.03E-07    | 2.49E-06    | up | myeloid leukemia factor 1 [Source:MGI Symbol;Acc:MGI:1341819]                                                                        |
| ENSMUSG00000022265 | Ank        | 14.88853867 | 4.153699667 | 1.841733347 | 6.23E-31    | 1.68E-28    | up | progressive ankylosis [Source:MGI Symbol;Acc:MGI:3045421]                                                                            |
| ENSMUSG00000105211 | AC125167.1 | 34.27447067 | 9.617673333 | 1.833374555 | 2.63E-05    | 0.000327519 | up | predicted gene, 47302 [Source:MGI Symbol;Acc:MGI:6096169]                                                                            |
| ENSMUSG00000073633 | Fbxo36     | 19.414901   | 5.470054667 | 1.827537194 | 9.85E-19    | 1.35E-16    | up | F-box protein 36 [Source:MGI Symbol;Acc:MGI:1289192]                                                                                 |
| ENSMUSG00000031387 | Renbp      | 8.909353    | 2.521000667 | 1.821324167 | 2.19E-12    | 1.37E-10    | up | renin binding protein [Source:MGI Symbol;Acc:MGI:105940]                                                                             |
| ENSMUSG00000025743 | Sdc3       | 81.50659933 | 23.07763167 | 1.820421699 | 6.95E-47    | 4.74E-44    | up | syndecan 3 [Source:MGI Symbol;Acc:MGI:1349163]                                                                                       |
| ENSMUSG00000030753 | Thap12     | 6.221851667 | 1.766173667 | 1.816716791 | 3.73E-21    | 6.23E-19    | up | THAP domain containing 12 [Source:MGI Symbol;Acc:MGI:1920231]                                                                        |
| ENSMUSG00000007888 | Crlf1      | 93.139066   | 26.53320767 | 1.811587318 | 1.46E-51    | 1.35E-48    | up | cytokine receptor-like factor 1 [Source:MGI Symbol;Acc:MGI:1340030]                                                                  |
| ENSMUSG00000027533 | Fabp5      | 308.647339  | 91.15753933 | 1.759525466 | 7.33E-32    | 2.09E-29    | up | fatty acid binding protein 5, epidermal [Source:MGI Symbol;Acc:MGI:101790]                                                           |
| ENSMUSG00000031827 | Cotl1      | 47.933141   | 14.326843   | 1.742302742 | 2.79E-31    | 7.82E-29    | up | coactosin-like 1 (Dictyostelium) [Source:MGI Symbol;Acc:MGI:1919292]                                                                 |
| ENSMUSG00000017400 | Stac2      | 55.844171   | 17.06885333 | 1.710040557 | 3.37E-42    | 1.60E-39    | up | SH3 and cysteine rich domain 2 [Source:MGI Symbol;Acc:MGI:2144518]                                                                   |
| ENSMUSG00000035493 | Tgfb1      | 123.0185823 | 37.831078   | 1.701232464 | 8.67E-24    | 1.70E-21    | up | transforming growth factor, beta induced [Source:MGI Symbol;Acc:MGI:99959]                                                           |
| ENSMUSG00000011148 | Adss1      | 9.510805    | 2.930614    | 1.698364498 | 3.80E-14    | 3.12E-12    | up | adenylosuccinate synthetase like 1 [Source:MGI Symbol;Acc:MGI:87947]                                                                 |
| ENSMUSG00000055553 | Kxd1       | 396.5764973 | 122.835176  | 1.69087542  | 0.002828444 | 0.015882258 | up | KxDL motif containing 1 [Source:MGI Symbol;Acc:MGI:1922870]                                                                          |
| ENSMUSG00000020601 | Trib2      | 15.49377667 | 4.840703333 | 1.678400264 | 2.85E-23    | 5.45E-21    | up | tribbles pseudokinase 2 [Source:MGI Symbol;Acc:MGI:2145021]                                                                          |
| ENSMUSG00000068758 | Il3ra      | 12.76740833 | 4.040900667 | 1.659716908 | 3.72E-14    | 3.07E-12    | up | interleukin 3 receptor, alpha chain [Source:MGI Symbol;Acc:MGI:96553]                                                                |
| ENSMUSG00000017002 | Slpi       | 666.7901813 | 211.7513987 | 1.654861361 | 3.13E-34    | 1.02E-31    | up | secretory leukocyte peptidase inhibitor [Source:MGI Symbol;Acc:MGI:109297]                                                           |
| ENSMUSG00000026473 | Glul       | 25.986215   | 8.363194    | 1.63562058  | 4.91E-31    | 1.35E-28    | up | glutamate-ammonia ligase (glutamine synthetase) [Source:MGI Symbol;Acc:MGI:95739]                                                    |
| ENSMUSG00000019846 | Lama4      | 5.836904667 | 1.880266333 | 1.634266476 | 6.34E-15    | 5.84E-13    | up | laminin, alpha 4 [Source:MGI Symbol;Acc:MGI:109321]                                                                                  |
| ENSMUSG00000033389 | Arhgap44   | 9.738489667 | 3.156669667 | 1.625294747 | 7.98E-21    | 1.29E-18    | up | Rho GTPase activating protein 44 [Source:MGI Symbol;Acc:MGI:2144423]                                                                 |
| ENSMUSG00000040133 | Gpr176     | 14.53914567 | 4.745164333 | 1.615412541 | 6.34E-21    | 1.03E-18    | up | G protein-coupled receptor 176 [Source:MGI Symbol;Acc:MGI:2685858]                                                                   |
| ENSMUSG00000031486 | Adgra2     | 34.79504767 | 11.37901233 | 1.612506643 | 0.003426476 | 0.018390318 | up | adhesion G protein-coupled receptor A2 [Source:MGI Symbol;Acc:MGI:1925810]                                                           |
| ENSMUSG00000021483 | Cdk20      | 7.924729    | 2.598170333 | 1.608865585 | 6.55E-09    | 2.14E-07    | up | cyclin-dependent kinase 20 [Source:MGI Symbol;Acc:MGI:2145349]                                                                       |

|                    |           |             |             |             |             |             |    |                                                                                                   |
|--------------------|-----------|-------------|-------------|-------------|-------------|-------------|----|---------------------------------------------------------------------------------------------------|
| ENSMUSG00000064346 | mt-Tw     | 117.4201277 | 39.17310667 | 1.583744278 | 9.48E-07    | 1.78E-05    | up | mitochondrially encoded tRNA tryptophan [Source:MGI Symbol;Acc:MGI:102471]                        |
| ENSMUSG00000044006 | Cilp2     | 6.740218667 | 2.25169     | 1.581787177 | 4.27E-14    | 3.49E-12    | up | cartilage intermediate layer protein 2 [Source:MGI Symbol;Acc:MGI:1915959]                        |
| ENSMUSG00000074064 | Mlycd     | 13.117038   | 4.386186667 | 1.580402861 | 1.54E-21    | 2.70E-19    | up | malonyl-CoA decarboxylase [Source:MGI Symbol;Acc:MGI:1928485]                                     |
| ENSMUSG00000038375 | Trp53inp2 | 17.648584   | 5.975431    | 1.562437755 | 2.89E-21    | 4.98E-19    | up | transformation related protein 53 inducible nuclear protein 2 [Source:MGI Symbol;Acc:MGI:1915978] |
| ENSMUSG00000021367 | Edn1      | 7.115876667 | 2.425485333 | 1.55276805  | 2.72E-14    | 2.28E-12    | up | endothelin 1 [Source:MGI Symbol;Acc:MGI:95283]                                                    |
| ENSMUSG00000023809 | Rps6ka2   | 7.023418    | 2.394676667 | 1.552342426 | 7.51E-18    | 9.27E-16    | up | ribosomal protein S6 kinase, polypeptide 2 [Source:MGI Symbol;Acc:MGI:1342290]                    |
| ENSMUSG00000047945 | Marcks1   | 119.8241093 | 41.04414733 | 1.545669795 | 4.81E-30    | 1.28E-27    | up | MARCKS-like 1 [Source:MGI Symbol;Acc:MGI:97143]                                                   |
| ENSMUSG00000086013 | Gm15706   | 9.678031    | 3.387947    | 1.514302255 | 6.78E-08    | 1.73E-06    | up | predicted gene 15706 [Source:MGI Symbol;Acc:MGI:3783146]                                          |
| ENSMUSG0000002948  | Map2k7    | 18.212841   | 6.406720333 | 1.507298064 | 6.42E-15    | 5.88E-13    | up | mitogen-activated protein kinase kinase 7 [Source:MGI Symbol;Acc:MGI:1346871]                     |
| ENSMUSG0000006435  | Neur1a    | 5.087136    | 1.800745    | 1.498259765 | 2.72E-12    | 1.68E-10    | up | neuralized E3 ubiquitin protein ligase 1A [Source:MGI Symbol;Acc:MGI:1334263]                     |
| ENSMUSG00000022032 | Scara5    | 6.709001333 | 2.381650333 | 1.494136414 | 4.58E-17    | 5.20E-15    | up | scavenger receptor class A, member 5 [Source:MGI Symbol;Acc:MGI:1918395]                          |
| ENSMUSG00000027602 | Map1lc3a  | 278.169281  | 99.247144   | 1.486865616 | 1.07E-36    | 3.72E-34    | up | microtubule-associated protein 1 light chain 3 alpha [Source:MGI Symbol;Acc:MGI:1915661]          |
| ENSMUSG00000048644 | Ctxn1     | 134.289004  | 48.43982933 | 1.47107549  | 1.90E-20    | 2.93E-18    | up | cortexin 1 [Source:MGI Symbol;Acc:MGI:88566]                                                      |
| ENSMUSG00000031880 | Rrad      | 19.72060867 | 7.191878    | 1.455263628 | 7.16E-19    | 1.00E-16    | up | Ras-related associated with diabetes [Source:MGI Symbol;Acc:MGI:1930943]                          |
| ENSMUSG00000039481 | Nrtn      | 5.463007667 | 2.004751    | 1.44627239  | 4.06E-05    | 0.00046909  | up | neurturin [Source:MGI Symbol;Acc:MGI:108417]                                                      |
| ENSMUSG00000031785 | Adgrg1    | 13.84822    | 5.084381    | 1.445556501 | 8.52E-10    | 3.48E-08    | up | adhesion G protein-coupled receptor G1 [Source:MGI Symbol;Acc:MGI:1340051]                        |
| ENSMUSG00000017830 | Dhx58     | 13.467853   | 4.975373667 | 1.436643094 | 1.50E-12    | 9.86E-11    | up | DEXH (Asp-Glu-X-His) box polypeptide 58 [Source:MGI Symbol;Acc:MGI:1931560]                       |
| ENSMUSG00000038236 | Hoxa7     | 20.07432567 | 7.437278333 | 1.432504856 | 5.06E-14    | 4.07E-12    | up | homeobox A7 [Source:MGI Symbol;Acc:MGI:96179]                                                     |
| ENSMUSG00000050578 | Mmp13     | 17.533935   | 6.508117    | 1.429837712 | 1.44E-15    | 1.40E-13    | up | matrix metalloproteinase 13 [Source:MGI Symbol;Acc:MGI:1340026]                                   |
| ENSMUSG00000006519 | Cyba      | 29.00412633 | 10.834794   | 1.420586439 | 1.33E-12    | 8.76E-11    | up | cytochrome b-245, alpha polypeptide [Source:MGI Symbol;Acc:MGI:1316658]                           |
| ENSMUSG00000038451 | Spsb2     | 44.6475     | 17.06389133 | 1.387632712 | 1.26E-07    | 3.00E-06    | up | splA/ryanodine receptor domain and SOCS box containing 2 [Source:MGI Symbol;Acc:MGI:1315199]      |
| ENSMUSG00000069662 | Marcks    | 42.74897533 | 16.39445267 | 1.382682102 | 1.93E-26    | 4.51E-24    | up | myristoylated alanine rich protein kinase C substrate [Source:MGI Symbol;Acc:MGI:96907]           |
| ENSMUSG00000004558 | Ndrg2     | 6.810189333 | 2.629438    | 1.372940428 | 6.66E-11    | 3.30E-09    | up | N-myc downstream regulated gene 2 [Source:MGI Symbol;Acc:MGI:1352498]                             |
| ENSMUSG00000110409 | Gm9908    | 6.794596333 | 2.629574    | 1.369558746 | 0.004039615 | 0.020990998 | up | predicted gene 9908 [Source:MGI Symbol;Acc:MGI:3708779]                                           |
| ENSMUSG00000100954 | Gm10138   | 10.079312   | 3.909542667 | 1.366325408 | 0.002448817 | 0.01415635  | up | predicted gene 10138 [Source:MGI Symbol;Acc:MGI:3708522]                                          |
| ENSMUSG00000061461 | Smim20    | 12.62512833 | 4.899498    | 1.365592209 | 5.80E-07    | 1.16E-05    | up | small integral membrane protein 20 [Source:MGI Symbol;Acc:MGI:1913528]                            |
| ENSMUSG00000026544 | Dusp23    | 20.883512   | 8.186851667 | 1.35098369  | 2.92E-16    | 3.03E-14    | up | dual specificity phosphatase 23 [Source:MGI Symbol;Acc:MGI:1915690]                               |
| ENSMUSG00000056054 | S100a8    | 18.283277   | 7.238078    | 1.336846115 | 2.85E-07    | 6.14E-06    | up | S100 calcium binding protein A8 (calgranulin A) [Source:MGI Symbol;Acc:MGI:88244]                 |
| ENSMUSG00000050530 | Fam171a1  | 5.101842667 | 2.034603    | 1.326271092 | 1.33E-11    | 7.45E-10    | up | family with sequence similarity 171, member A1 [Source:MGI Symbol;Acc:MGI:2442917]                |
| ENSMUSG00000042814 | Mets2     | 17.39615267 | 6.991666    | 1.315060103 | 2.70E-09    | 9.79E-08    | up | malignant T cell amplified sequence 2 [Source:MGI Symbol;Acc:MGI:1913655]                         |

|                    |          |             |             |             |             |             |    |                                                                                                                                 |
|--------------------|----------|-------------|-------------|-------------|-------------|-------------|----|---------------------------------------------------------------------------------------------------------------------------------|
| ENSMUSG00000095677 | Dynlt1f  | 80.78938033 | 32.552014   | 1.311418859 | 8.61E-21    | 1.38E-18    | up | dynein light chain Tctex-type 1F [Source:MGI Symbol;Acc:MGI:3780996]                                                            |
| ENSMUSG00000006356 | Crip2    | 27.173961   | 10.99663567 | 1.305162665 | 1.12E-06    | 2.05E-05    | up | cysteine rich protein 2 [Source:MGI Symbol;Acc:MGI:1915587]                                                                     |
| ENSMUSG00000025978 | Rftn2    | 5.715010333 | 2.323500333 | 1.298456255 | 6.62E-10    | 2.74E-08    | up | raftlin family member 2 [Source:MGI Symbol;Acc:MGI:1921263]                                                                     |
| ENSMUSG00000006517 | Mvd      | 183.6400653 | 75.34119933 | 1.285369946 | 4.26E-19    | 6.13E-17    | up | mevalonate (diphospho) decarboxylase [Source:MGI Symbol;Acc:MGI:2179327]                                                        |
| ENSMUSG00000023046 | Igfbp6   | 477.894419  | 199.4392397 | 1.260742632 | 1.40E-18    | 1.87E-16    | up | insulin-like growth factor binding protein 6 [Source:MGI Symbol;Acc:MGI:96441]                                                  |
| ENSMUSG00000021069 | Pygl     | 5.757812667 | 2.410487667 | 1.256195803 | 2.14E-07    | 4.76E-06    | up | liver glycogen phosphorylase [Source:MGI Symbol;Acc:MGI:97829]                                                                  |
| ENSMUSG00000093803 | Ppp2r3d  | 24.162527   | 10.20174933 | 1.243954787 | 0.000311561 | 0.002637918 | up | protein phosphatase 2 (formerly 2A), regulatory subunit B", delta [Source:MGI Symbol;Acc:MGI:1335093]                           |
| ENSMUSG00000015337 | Endog    | 33.017967   | 13.96745867 | 1.241181742 | 1.19E-14    | 1.06E-12    | up | endonuclease G [Source:MGI Symbol;Acc:MGI:1261433]                                                                              |
| ENSMUSG00000040699 | Limd2    | 47.02406933 | 19.91420667 | 1.239601384 | 8.65E-17    | 9.61E-15    | up | LIM domain containing 2 [Source:MGI Symbol;Acc:MGI:1915053]                                                                     |
| ENSMUSG00000041347 | Bdkrb1   | 25.08119967 | 10.635292   | 1.237746712 | 3.01E-12    | 1.85E-10    | up | bradykinin receptor, beta 1 [Source:MGI Symbol;Acc:MGI:88144]                                                                   |
| ENSMUSG00000020241 | Col6a2   | 270.9947153 | 115.0100837 | 1.236504361 | 3.05E-23    | 5.75E-21    | up | collagen, type VI, alpha 2 [Source:MGI Symbol;Acc:MGI:88460]                                                                    |
| ENSMUSG00000058665 | En1      | 8.227709333 | 3.491944    | 1.236460405 | 1.91E-10    | 8.78E-09    | up | engrailed 1 [Source:MGI Symbol;Acc:MGI:95389]                                                                                   |
| ENSMUSG00000031722 | Hp       | 164.31249   | 69.90693933 | 1.232934572 | 2.21E-11    | 1.20E-09    | up | haptoglobin [Source:MGI Symbol;Acc:MGI:96211]                                                                                   |
| ENSMUSG00000097084 | Foxl1    | 6.292959    | 2.687755    | 1.227336907 | 3.44E-09    | 1.23E-07    | up | forkhead box L1 [Source:MGI Symbol;Acc:MGI:1347469]                                                                             |
| ENSMUSG00000021265 | Slc25a29 | 5.349758333 | 2.294223    | 1.221468092 | 5.21E-06    | 7.98E-05    | up | solute carrier family 25 (mitochondrial carrier, palmitoylcarnitine transporter), member 29 [Source:MGI Symbol;Acc:MGI:2444911] |
| ENSMUSG00000044646 | Zbtb7c   | 11.364834   | 4.907848333 | 1.21141404  | 5.32E-19    | 7.58E-17    | up | zinc finger and BTB domain containing 7C [Source:MGI Symbol;Acc:MGI:2443302]                                                    |
| ENSMUSG00000049985 | Ankrd55  | 5.975885667 | 2.580859333 | 1.211301035 | 3.20E-06    | 5.22E-05    | up | ankyrin repeat domain 55 [Source:MGI Symbol;Acc:MGI:1924568]                                                                    |
| ENSMUSG00000019929 | Dcn      | 13.25811    | 5.756037333 | 1.203727273 | 2.30E-09    | 8.47E-08    | up | decorin [Source:MGI Symbol;Acc:MGI:94872]                                                                                       |
| ENSMUSG00000062380 | Tubb3    | 89.933121   | 39.1087     | 1.201362956 | 5.23E-21    | 8.63E-19    | up | tubulin, beta 3 class III [Source:MGI Symbol;Acc:MGI:107813]                                                                    |
| ENSMUSG00000051920 | Rspo2    | 19.31985567 | 8.497614333 | 1.184954543 | 7.68E-16    | 7.76E-14    | up | R-spondin 2 [Source:MGI Symbol;Acc:MGI:1922667]                                                                                 |
| ENSMUSG00000004098 | Col5a3   | 8.284322    | 3.675647    | 1.17238541  | 4.00E-11    | 2.07E-09    | up | collagen, type V, alpha 3 [Source:MGI Symbol;Acc:MGI:1858212]                                                                   |
| ENSMUSG00000035273 | Hpse     | 5.126043667 | 2.275539667 | 1.171637033 | 1.22E-06    | 2.23E-05    | up | heparanase [Source:MGI Symbol;Acc:MGI:1343124]                                                                                  |
| ENSMUSG00000064342 | mt-Ti    | 51.987629   | 23.29384533 | 1.158219541 | 0.003666372 | 0.019379125 | up | mitochondrially encoded tRNA isoleucine [Source:MGI Symbol;Acc:MGI:102484]                                                      |
| ENSMUSG00000110344 | Gm45716  | 5.737275333 | 2.577946667 | 1.154143338 | 9.49E-06    | 0.000135748 | up | predicted gene 45716 [Source:MGI Symbol;Acc:MGI:5804831]                                                                        |
| ENSMUSG00000097248 | Gm2694   | 23.920808   | 10.797563   | 1.147560388 | 2.87E-07    | 6.17E-06    | up | predicted gene 2694 [Source:MGI Symbol;Acc:MGI:3780864]                                                                         |
| ENSMUSG00000031066 | Usp11    | 13.26406167 | 6.008642    | 1.142411747 | 3.71E-13    | 2.66E-11    | up | ubiquitin specific peptidase 11 [Source:MGI Symbol;Acc:MGI:2384312]                                                             |
| ENSMUSG00000071324 | Armc2    | 9.587352333 | 4.353670667 | 1.138900173 | 3.52E-05    | 0.000417788 | up | armadillo repeat containing 2 [Source:MGI Symbol;Acc:MGI:1916449]                                                               |
| ENSMUSG00000047250 | Ptgs1    | 58.27789567 | 26.494922   | 1.137232904 | 1.70E-15    | 1.64E-13    | up | prostaglandin-endoperoxide synthase 1 [Source:MGI Symbol;Acc:MGI:97797]                                                         |
| ENSMUSG00000037379 | Spon2    | 25.93269133 | 11.82264267 | 1.133219388 | 1.96E-13    | 1.50E-11    | up | spondin 2, extracellular matrix protein [Source:MGI Symbol;Acc:MGI:1923724]                                                     |
| ENSMUSG00000051550 | Zfp579   | 16.00503167 | 7.364889667 | 1.119789714 | 5.70E-11    | 2.85E-09    | up | zinc finger protein 579 [Source:MGI Symbol;Acc:MGI:1915740]                                                                     |

|                    |               |             |             |             |             |             |    |                                                                                             |
|--------------------|---------------|-------------|-------------|-------------|-------------|-------------|----|---------------------------------------------------------------------------------------------|
| ENSMUSG00000020878 | Lrrc46        | 5.409307667 | 2.494091667 | 1.116929466 | 3.54E-05    | 0.000419162 | up | leucine rich repeat containing 46 [Source:MGI Symbol;Acc:MGI:1916547]                       |
| ENSMUSG00000008734 | Gprc5b        | 5.711167333 | 2.636345    | 1.115246477 | 4.75E-10    | 2.06E-08    | up | G protein-coupled receptor, family C, group 5, member B [Source:MGI Symbol;Acc:MGI:1927596] |
| ENSMUSG00000000782 | Tcf7          | 31.56276567 | 14.58519333 | 1.113719116 | 1.24E-15    | 1.23E-13    | up | transcription factor 7, T cell specific [Source:MGI Symbol;Acc:MGI:98507]                   |
| ENSMUSG00000022575 | Gsdmd         | 145.8279723 | 68.060632   | 1.099375027 | 1.80E-20    | 2.79E-18    | up | gasdermin D [Source:MGI Symbol;Acc:MGI:1916396]                                             |
| ENSMUSG00000024913 | Lrp5          | 10.33580333 | 4.826808333 | 1.098509079 | 1.85E-14    | 1.59E-12    | up | low density lipoprotein receptor-related protein 5 [Source:MGI Symbol;Acc:MGI:1278315]      |
| ENSMUSG00000031930 | Wwp2          | 104.323471  | 48.78891133 | 1.096438579 | 1.52E-22    | 2.73E-20    | up | WW domain containing E3 ubiquitin protein ligase 2 [Source:MGI Symbol;Acc:MGI:1914144]      |
| ENSMUSG00000059895 | Ptp4a3        | 23.701259   | 11.08862833 | 1.095882782 | 1.47E-16    | 1.56E-14    | up | protein tyrosine phosphatase 4a3 [Source:MGI Symbol;Acc:MGI:1277098]                        |
| ENSMUSG00000020695 | Mre2          | 44.74411767 | 20.94684133 | 1.094965319 | 9.47E-19    | 1.31E-16    | up | mannose receptor, C type 2 [Source:MGI Symbol;Acc:MGI:107818]                               |
| ENSMUSG00000033857 | Engase        | 10.48556533 | 4.933545    | 1.087708074 | 5.78E-08    | 1.51E-06    | up | endo-beta-N-acetylglucosaminidase [Source:MGI Symbol;Acc:MGI:2443788]                       |
| ENSMUSG00000052957 | Gas1          | 217.1048127 | 102.1897683 | 1.087140952 | 3.76E-19    | 5.46E-17    | up | growth arrest specific 1 [Source:MGI Symbol;Acc:MGI:95655]                                  |
| ENSMUSG00000033862 | Cdk10         | 41.49596133 | 19.560361   | 1.085037934 | 1.16E-12    | 7.71E-11    | up | cyclin-dependent kinase 10 [Source:MGI Symbol;Acc:MGI:2448549]                              |
| ENSMUSG00000095180 | Rhox5         | 9.330577333 | 4.399320333 | 1.084685697 | 0.000233231 | 0.002073278 | up | reproductive homeobox 5 [Source:MGI Symbol;Acc:MGI:97538]                                   |
| ENSMUSG00000071547 | Nt5dc2        | 335.8099263 | 158.44104   | 1.0836988   | 2.92E-14    | 2.43E-12    | up | 5'-nucleotidase domain containing 2 [Source:MGI Symbol;Acc:MGI:1917271]                     |
| ENSMUSG00000069300 | Hist1h2bj     | 24.03386367 | 11.343274   | 1.083231489 | 2.41E-06    | 4.05E-05    | up | histone cluster 1, H2bj [Source:MGI Symbol;Acc:MGI:2448388]                                 |
| ENSMUSG00000024644 | Cndp2         | 85.52006033 | 40.45266467 | 1.080028133 | 1.72E-18    | 2.29E-16    | up | CNDP dipeptidase 2 (metallopeptidase M20 family) [Source:MGI Symbol;Acc:MGI:1913304]        |
| ENSMUSG00000034520 | Gje1          | 10.55965967 | 5.002640333 | 1.0778017   | 2.79E-07    | 6.03E-06    | up | gap junction protein, gamma 1 [Source:MGI Symbol;Acc:MGI:95718]                             |
| ENSMUSG00000055633 | Zfp580        | 63.33933167 | 30.05615833 | 1.075441024 | 4.20E-13    | 2.96E-11    | up | zinc finger protein 580 [Source:MGI Symbol;Acc:MGI:1916242]                                 |
| ENSMUSG00000022013 | Dnajc15       | 41.83602267 | 19.876205   | 1.073703375 | 1.41E-09    | 5.41E-08    | up | DnaJ heat shock protein family (Hsp40) member C15 [Source:MGI Symbol;Acc:MGI:1913398]       |
| ENSMUSG00000063594 | Gng8          | 7.820665333 | 3.722157333 | 1.07115231  | 0.000645012 | 0.004788553 | up | guanine nucleotide binding protein (G protein), gamma 8 [Source:MGI Symbol;Acc:MGI:109163]  |
| ENSMUSG00000002732 | Fkbp7         | 5.935017667 | 2.825273667 | 1.070861705 | 0.000944564 | 0.00651263  | up | FK506 binding protein 7 [Source:MGI Symbol;Acc:MGI:1336879]                                 |
| ENSMUSG00000030630 | Fah           | 28.417851   | 13.548349   | 1.068680404 | 4.72E-15    | 4.38E-13    | up | fumarylacetoacetate hydrolase [Source:MGI Symbol;Acc:MGI:95482]                             |
| ENSMUSG00000071715 | Ncf4          | 9.078374333 | 4.328254333 | 1.068648701 | 2.91E-06    | 4.80E-05    | up | neutrophil cytosolic factor 4 [Source:MGI Symbol;Acc:MGI:109186]                            |
| ENSMUSG00000032661 | Oas3          | 7.253411667 | 3.466676333 | 1.065106586 | 1.07E-05    | 0.000151575 | up | 2'-5' oligoadenylate synthetase 3 [Source:MGI Symbol;Acc:MGI:2180850]                       |
| ENSMUSG00000045251 | Zfp688        | 8.314679333 | 3.977509667 | 1.063795188 | 0.003911272 | 0.020432484 | up | zinc finger protein 688 [Source:MGI Symbol;Acc:MGI:1916484]                                 |
| ENSMUSG00000062175 | Tgfi2         | 6.389929    | 3.073948667 | 1.055706828 | 7.30E-05    | 0.000769266 | up | TGFB-induced factor homeobox 2 [Source:MGI Symbol;Acc:MGI:1915299]                          |
| ENSMUSG00000097960 | A330074K22Rik | 5.449243    | 2.635707    | 1.047865826 | 3.39E-06    | 5.50E-05    | up | RIKEN cDNA A330074K22 gene [Source:MGI Symbol;Acc:MGI:3045392]                              |
| ENSMUSG00000059920 | 4930453N24Rik | 13.72963733 | 6.650578667 | 1.045741737 | 2.03E-05    | 0.000264717 | up | RIKEN cDNA 4930453N24 gene [Source:MGI Symbol;Acc:MGI:1914859]                              |
| ENSMUSG00000031748 | Gnao1         | 35.203316   | 17.09029667 | 1.04253389  | 2.32E-17    | 2.76E-15    | up | guanine nucleotide binding protein, alpha O [Source:MGI Symbol;Acc:MGI:95775]               |
| ENSMUSG00000001552 | Jup           | 19.03851233 | 9.250062333 | 1.041385758 | 2.88E-11    | 1.52E-09    | up | junction plakoglobin [Source:MGI Symbol;Acc:MGI:96650]                                      |
| ENSMUSG00000024873 | Cnih2         | 30.35276767 | 14.759334   | 1.04020045  | 1.15E-11    | 6.58E-10    | up | cornichon family AMPA receptor auxiliary protein 2 [Source:MGI Symbol;Acc:MGI:1277225]      |

|                    |               |             |             |              |             |             |      |                                                                                                                              |
|--------------------|---------------|-------------|-------------|--------------|-------------|-------------|------|------------------------------------------------------------------------------------------------------------------------------|
| ENSMUSG00000039347 | Atp6v0e2      | 15.535149   | 7.555957667 | 1.039849555  | 2.65E-07    | 5.78E-06    | up   | ATPase, H+ transporting, lysosomal V0 subunit E2 [Source:MGI Symbol;Acc:MGI:1923502]                                         |
| ENSMUSG00000034936 | Arl4d         | 13.78461267 | 6.717545    | 1.037052744  | 4.46E-08    | 1.20E-06    | up   | ADP-ribosylation factor-like 4D [Source:MGI Symbol;Acc:MGI:1933155]                                                          |
| ENSMUSG00000038523 | 1700003F12Rik | 81.74278767 | 39.99063767 | 1.031429159  | 4.74E-07    | 9.71E-06    | up   | RIKEN cDNA 1700003F12 gene [Source:MGI Symbol;Acc:MGI:1922730]                                                               |
| ENSMUSG00000053333 | Dis3l2        | 9.262444333 | 4.536793667 | 1.02971992   | 7.99E-09    | 2.56E-07    | up   | DIS3 like 3'-5' exoribonuclease 2 [Source:MGI Symbol;Acc:MGI:2442555]                                                        |
| ENSMUSG00000090258 | Churc1        | 71.61619067 | 35.14735667 | 1.02686959   | 2.49E-14    | 2.11E-12    | up   | churchill domain containing 1 [Source:MGI Symbol;Acc:MGI:1923684]                                                            |
| ENSMUSG00000037362 | Nov           | 102.8955687 | 50.559863   | 1.025116393  | 2.59E-14    | 2.18E-12    | up   | cellular communication network factor 3 [Source:MGI Symbol;Acc:MGI:109185]                                                   |
| ENSMUSG00000030468 | Siglecg       | 5.841731667 | 2.872931333 | 1.02387258   | 1.09E-06    | 2.01E-05    | up   | sialic acid binding Ig-like lectin G [Source:MGI Symbol;Acc:MGI:2443630]                                                     |
| ENSMUSG00000055737 | Ghr           | 16.36125433 | 8.076079    | 1.018556428  | 7.58E-06    | 0.000111975 | up   | growth hormone receptor [Source:MGI Symbol;Acc:MGI:95708]                                                                    |
| ENSMUSG00000056820 | Tsnax         | 20.87407067 | 10.37584533 | 1.008483089  | 8.61E-12    | 5.00E-10    | up   | translin-associated factor X [Source:MGI Symbol;Acc:MGI:1855672]                                                             |
| ENSMUSG00000096727 | Psmb9         | 5.656512333 | 2.819239667 | 1.004606669  | 6.32E-05    | 0.000680128 | up   | proteasome (prosome, macropain) subunit, beta type 9 (large multifunctional peptidase 2) [Source:MGI Symbol;Acc:MGI:1346526] |
| ENSMUSG00000024892 | Pcx           | 31.55169067 | 15.748379   | 1.002513975  | 1.19E-17    | 1.45E-15    | up   | pyruvate carboxylase [Source:MGI Symbol;Acc:MGI:97520]                                                                       |
| ENSMUSG00000029836 | Cbx3          | 24.23353233 | 48.469706   | -1.000078621 | 5.36E-08    | 1.42E-06    | down | chromobox 3 [Source:MGI Symbol;Acc:MGI:108515]                                                                               |
| ENSMUSG00000032050 | Rdx           | 9.289297667 | 18.59360433 | -1.001165033 | 7.17E-07    | 1.40E-05    | down | radixin [Source:MGI Symbol;Acc:MGI:97887]                                                                                    |
| ENSMUSG00000023026 | Dip2b         | 3.059875667 | 6.128758667 | -1.002121864 | 6.29E-08    | 1.62E-06    | down | disco interacting protein 2 homolog B [Source:MGI Symbol;Acc:MGI:2145977]                                                    |
| ENSMUSG00000023830 | Igf2r         | 5.605067667 | 11.23022633 | -1.002583309 | 7.72E-09    | 2.50E-07    | down | insulin-like growth factor 2 receptor [Source:MGI Symbol;Acc:MGI:96435]                                                      |
| ENSMUSG00000032366 | Tpm1          | 174.8991647 | 350.5125833 | -1.002942839 | 9.28E-11    | 4.53E-09    | down | tropomyosin 1, alpha [Source:MGI Symbol;Acc:MGI:98809]                                                                       |
| ENSMUSG0000005610  | Eif4g2        | 34.36299833 | 68.881724   | -1.003265328 | 1.24E-07    | 2.94E-06    | down | eukaryotic translation initiation factor 4, gamma 2 [Source:MGI Symbol;Acc:MGI:109207]                                       |
| ENSMUSG00000022114 | Spry2         | 5.030714333 | 10.08720767 | -1.00369169  | 4.13E-06    | 6.55E-05    | down | sprouty RTK signaling antagonist 2 [Source:MGI Symbol;Acc:MGI:1345138]                                                       |
| ENSMUSG00000024976 | Shoc2         | 2.953841667 | 5.925379667 | -1.004315101 | 0.000704521 | 0.005135469 | down | Shoc2, leucine rich repeat scaffold protein [Source:MGI Symbol;Acc:MGI:1927197]                                              |
| ENSMUSG00000025758 | Plk4          | 2.823620667 | 5.667264333 | -1.005106209 | 0.000212387 | 0.001927344 | down | polo like kinase 4 [Source:MGI Symbol;Acc:MGI:101783]                                                                        |
| ENSMUSG00000055319 | Sec23ip       | 7.712623333 | 15.51358533 | -1.008238585 | 3.05E-09    | 1.09E-07    | down | Sec23 interacting protein [Source:MGI Symbol;Acc:MGI:2450915]                                                                |
| ENSMUSG00000027782 | Kpna4         | 7.780534667 | 15.65912733 | -1.009062611 | 2.74E-07    | 5.96E-06    | down | karyopherin (importin) alpha 4 [Source:MGI Symbol;Acc:MGI:1100848]                                                           |
| ENSMUSG00000070372 | Capza1        | 12.32238933 | 24.821892   | -1.010331062 | 5.57E-07    | 1.12E-05    | down | capping protein (actin filament) muscle Z-line, alpha 1 [Source:MGI Symbol;Acc:MGI:106227]                                   |
| ENSMUSG00000025762 | Larp1b        | 3.134080333 | 6.315902333 | -1.010946702 | 0.0019048   | 0.011579528 | down | La ribonucleoprotein domain family, member 1B [Source:MGI Symbol;Acc:MGI:1914604]                                            |
| ENSMUSG00000016918 | Sulf1         | 4.614108333 | 9.308887667 | -1.012556911 | 1.52E-07    | 3.53E-06    | down | sulfatase 1 [Source:MGI Symbol;Acc:MGI:2138563]                                                                              |
| ENSMUSG00000009207 | Lnpk          | 2.761923667 | 5.578505333 | -1.014205181 | 0.006868351 | 0.031836968 | down | lunapark, ER junction formation factor [Source:MGI Symbol;Acc:MGI:1918115]                                                   |
| ENSMUSG00000057363 | Uxs1          | 5.980717    | 12.08601033 | -1.014947723 | 0.001212058 | 0.007991322 | down | UDP-glucuronate decarboxylase 1 [Source:MGI Symbol;Acc:MGI:1915133]                                                          |
| ENSMUSG00000032582 | Rbm6          | 3.970076    | 8.029023333 | -1.016057881 | 2.61E-05    | 0.000325484 | down | RNA binding motif protein 6 [Source:MGI Symbol;Acc:MGI:1338037]                                                              |
| ENSMUSG00000038949 | Cnst          | 2.744663    | 5.559690667 | -1.018375595 | 0.000514155 | 0.003985081 | down | consortin, connexin sorting protein [Source:MGI Symbol;Acc:MGI:2445141]                                                      |
| ENSMUSG00000039286 | Fndc3b        | 3.141470667 | 6.365922333 | -1.018929447 | 7.23E-07    | 1.41E-05    | down | fibronectin type III domain containing 3B [Source:MGI Symbol;Acc:MGI:1919257]                                                |

|                    |         |             |             |              |             |             |      |                                                                                                     |
|--------------------|---------|-------------|-------------|--------------|-------------|-------------|------|-----------------------------------------------------------------------------------------------------|
| ENSMUSG00000032504 | Pcd6ip  | 20.60602367 | 41.76492067 | -1.019225562 | 2.92E-07    | 6.27E-06    | down | programmed cell death 6 interacting protein [Source:MGI Symbol;Acc:MGI:1333753]                     |
| ENSMUSG00000032096 | Arcn1   | 13.02953067 | 26.40966167 | -1.019280701 | 1.44E-10    | 6.75E-09    | down | archain 1 [Source:MGI Symbol;Acc:MGI:2387591]                                                       |
| ENSMUSG00000016409 | Nkap    | 2.537179333 | 5.143825    | -1.019616065 | 5.00E-05    | 0.000561383 | down | NFKB activating protein [Source:MGI Symbol;Acc:MGI:1914300]                                         |
| ENSMUSG00000028402 | Mpdz    | 3.425776333 | 6.955825333 | -1.021790744 | 3.93E-05    | 0.000456811 | down | multiple PDZ domain protein [Source:MGI Symbol;Acc:MGI:1343489]                                     |
| ENSMUSG00000034311 | Kif4    | 7.386943667 | 15.02100467 | -1.023931829 | 1.08E-08    | 3.36E-07    | down | kinesin family member 4 [Source:MGI Symbol;Acc:MGI:108389]                                          |
| ENSMUSG00000032402 | Smad3   | 7.469987333 | 15.19648667 | -1.024560118 | 2.21E-08    | 6.33E-07    | down | SMAD family member 3 [Source:MGI Symbol;Acc:MGI:1201674]                                            |
| ENSMUSG00000040339 | Fam102b | 3.17753     | 6.46444     | -1.024619652 | 5.88E-06    | 8.93E-05    | down | family with sequence similarity 102, member B [Source:MGI Symbol;Acc:MGI:3036259]                   |
| ENSMUSG00000025060 | Slk     | 2.782354667 | 5.673275333 | -1.027875555 | 1.01E-06    | 1.89E-05    | down | STE20-like kinase [Source:MGI Symbol;Acc:MGI:103241]                                                |
| ENSMUSG00000025234 | Arih1   | 2.967233333 | 6.066062    | -1.031641864 | 1.18E-06    | 2.17E-05    | down | ariadne RBR E3 ubiquitin protein ligase 1 [Source:MGI Symbol;Acc:MGI:1344363]                       |
| ENSMUSG00000070348 | Cnd1    | 54.30911733 | 111.07195   | -1.032228205 | 5.51E-13    | 3.84E-11    | down | cyclin D1 [Source:MGI Symbol;Acc:MGI:88313]                                                         |
| ENSMUSG00000026393 | Nek7    | 2.751867333 | 5.629795667 | -1.032671641 | 4.81E-06    | 7.43E-05    | down | NIMA (never in mitosis gene a)-related expressed kinase 7 [Source:MGI Symbol;Acc:MGI:1890645]       |
| ENSMUSG00000068882 | Ssb     | 14.678174   | 30.06572933 | -1.034447451 | 5.94E-06    | 8.99E-05    | down | Sjogren syndrome antigen B [Source:MGI Symbol;Acc:MGI:98423]                                        |
| ENSMUSG00000022521 | Crebbp  | 3.567736333 | 7.319332333 | -1.036703053 | 1.64E-06    | 2.88E-05    | down | CREB binding protein [Source:MGI Symbol;Acc:MGI:1098280]                                            |
| ENSMUSG00000022533 | Atp13a3 | 2.857924333 | 5.865151667 | -1.037200695 | 2.21E-07    | 4.89E-06    | down | ATPase type 13A3 [Source:MGI Symbol;Acc:MGI:2685387]                                                |
| ENSMUSG00000057858 | Fam204a | 4.233116    | 8.689815667 | -1.037605551 | 3.98E-05    | 0.000462228 | down | family with sequence similarity 204, member A [Source:MGI Symbol;Acc:MGI:1289174]                   |
| ENSMUSG00000024974 | Smc3    | 6.527421333 | 13.40174567 | -1.037835863 | 5.71E-05    | 0.000623857 | down | structural maintenance of chromosomes 3 [Source:MGI Symbol;Acc:MGI:1339795]                         |
| ENSMUSG00000095115 | Itpril2 | 7.329493667 | 15.054846   | -1.038442507 | 7.97E-08    | 2.00E-06    | down | inositol 1,4,5-triphosphate receptor interacting protein-like 2 [Source:MGI Symbol;Acc:MGI:2442416] |
| ENSMUSG00000044864 | Ankrd50 | 4.297817333 | 8.833376    | -1.039360756 | 1.01E-08    | 3.19E-07    | down | ankyrin repeat domain 50 [Source:MGI Symbol;Acc:MGI:2139777]                                        |
| ENSMUSG00000028675 | Pnrc2   | 8.127212333 | 16.71050733 | -1.039923042 | 1.40E-06    | 2.51E-05    | down | proline-rich nuclear receptor coactivator 2 [Source:MGI Symbol;Acc:MGI:106512]                      |
| ENSMUSG00000032280 | Tle3    | 8.146050667 | 16.75467133 | -1.040390694 | 7.70E-07    | 1.49E-05    | down | transducin-like enhancer of split 3 [Source:MGI Symbol;Acc:MGI:104634]                              |
| ENSMUSG00000035024 | Ncapd3  | 5.032042    | 10.355772   | -1.041219238 | 6.52E-07    | 1.29E-05    | down | non-SMC condensin II complex, subunit D3 [Source:MGI Symbol;Acc:MGI:2142989]                        |
| ENSMUSG00000042323 | Pbrn1   | 4.555689333 | 9.375918333 | -1.041290635 | 0.000625877 | 0.004675286 | down | polybromo 1 [Source:MGI Symbol;Acc:MGI:1923998]                                                     |
| ENSMUSG00000041625 | Ggact   | 24.25105633 | 49.94296767 | -1.04223396  | 8.31E-08    | 2.06E-06    | down | gamma-glutamylamine cyclotransferase [Source:MGI Symbol;Acc:MGI:2385008]                            |
| ENSMUSG00000028228 | Cpne3   | 2.610606333 | 5.37714     | -1.042454112 | 6.94E-06    | 0.000103141 | down | copine III [Source:MGI Symbol;Acc:MGI:1917818]                                                      |
| ENSMUSG00000026308 | Klhl30  | 3.132980333 | 6.454249    | -1.042713523 | 7.08E-05    | 0.000749093 | down | kelch-like 30 [Source:MGI Symbol;Acc:MGI:1918038]                                                   |
| ENSMUSG00000039601 | Rean2   | 10.04500133 | 20.69703367 | -1.042946258 | 7.76E-08    | 1.95E-06    | down | regulator of calcineurin 2 [Source:MGI Symbol;Acc:MGI:1858219]                                      |
| ENSMUSG00000001870 | Ltbp1   | 46.14186233 | 95.13934833 | -1.04396591  | 1.14E-14    | 1.02E-12    | down | latent transforming growth factor beta binding protein 1 [Source:MGI Symbol;Acc:MGI:109151]         |
| ENSMUSG00000082585 | Gm15387 | 5.885794    | 12.13898733 | -1.044339119 | 0.003088107 | 0.016981336 | down | predicted gene 15387 [Source:MGI Symbol;Acc:MGI:3705374]                                            |
| ENSMUSG00000022807 | Osbp11  | 3.433973667 | 7.091645    | -1.046241342 | 1.40E-07    | 3.29E-06    | down | oxysterol binding protein-like 11 [Source:MGI Symbol;Acc:MGI:2146553]                               |
| ENSMUSG00000015880 | Ncapg   | 3.900256333 | 8.056456667 | -1.046576518 | 1.91E-05    | 0.000250448 | down | non-SMC condensin I complex, subunit G [Source:MGI Symbol;Acc:MGI:1930197]                          |



|                    |         |             |             |              |             |             |      |                                                                                                   |
|--------------------|---------|-------------|-------------|--------------|-------------|-------------|------|---------------------------------------------------------------------------------------------------|
| ENSMUSG00000029334 | Prkg2   | 2.515371    | 5.201596    | -1.048183148 | 6.73E-05    | 0.000720031 | down | protein kinase, cGMP-dependent, type II [Source:MGI Symbol;Acc:MGI:108173]                        |
| ENSMUSG00000059005 | Hnrnpa3 | 73.635793   | 152.4123357 | -1.049500564 | 0.000118921 | 0.001169951 | down | heterogeneous nuclear ribonucleoprotein A3 [Source:MGI Symbol;Acc:MGI:1917171]                    |
| ENSMUSG00000029686 | Cu1l    | 8.137838667 | 16.85262033 | -1.050255342 | 2.25E-06    | 3.81E-05    | down | cullin 1 [Source:MGI Symbol;Acc:MGI:1349658]                                                      |
| ENSMUSG00000028771 | Ptpn12  | 4.786558    | 9.919827333 | -1.051326418 | 1.46E-07    | 3.41E-06    | down | protein tyrosine phosphatase, non-receptor type 12 [Source:MGI Symbol;Acc:MGI:104673]             |
| ENSMUSG00000026502 | Desi2   | 3.403923667 | 7.073113667 | -1.055146761 | 1.09E-07    | 2.64E-06    | down | desumoylating isopeptidase 2 [Source:MGI Symbol;Acc:MGI:1926075]                                  |
| ENSMUSG00000067873 | Htatsf1 | 6.693624667 | 13.926246   | -1.056946851 | 1.53E-08    | 4.63E-07    | down | HIV TAT specific factor 1 [Source:MGI Symbol;Acc:MGI:1919709]                                     |
| ENSMUSG00000005803 | Sqrdl   | 79.869362   | 166.288503  | -1.057974331 | 2.14E-12    | 1.35E-10    | down | sulfide quinone oxidoreductase [Source:MGI Symbol;Acc:MGI:1929899]                                |
| ENSMUSG00000069833 | Ahnak   | 29.83337167 | 62.13831967 | -1.058556193 | 1.02E-08    | 3.20E-07    | down | AHNAK nucleoprotein (desmoyokin) [Source:MGI Symbol;Acc:MGI:1316648]                              |
| ENSMUSG00000024073 | Birc6   | 3.180380333 | 6.626536    | -1.059055599 | 5.00E-08    | 1.33E-06    | down | baculoviral IAP repeat-containing 6 [Source:MGI Symbol;Acc:MGI:1276108]                           |
| ENSMUSG00000022973 | Synj1   | 3.012905333 | 6.278775667 | -1.059327924 | 3.09E-07    | 6.61E-06    | down | synaptojanin 1 [Source:MGI Symbol;Acc:MGI:1354961]                                                |
| ENSMUSG00000000420 | Galnt1  | 4.974169667 | 10.370255   | -1.059923747 | 1.97E-05    | 0.000257446 | down | polypeptide N-acetylgalactosaminyltransferase 1 [Source:MGI Symbol;Acc:MGI:894693]                |
| ENSMUSG00000030157 | Clec2d  | 3.440092    | 7.191808    | -1.063907358 | 0.007361494 | 0.033498644 | down | C-type lectin domain family 2, member d [Source:MGI Symbol;Acc:MGI:2135589]                       |
| ENSMUSG00000004535 | Tax1bp1 | 6.248133667 | 13.07090433 | -1.064861737 | 3.83E-05    | 0.000446574 | down | Tax1 (human T cell leukemia virus type I) binding protein 1 [Source:MGI Symbol;Acc:MGI:1289308]   |
| ENSMUSG00000038740 | Mvb12b  | 11.23079767 | 23.51149667 | -1.065905981 | 1.29E-13    | 9.95E-12    | down | multivesicular body subunit 12B [Source:MGI Symbol;Acc:MGI:1919793]                               |
| ENSMUSG00000023027 | Atf1    | 14.32683333 | 29.99454767 | -1.06598051  | 2.05E-09    | 7.59E-08    | down | activating transcription factor 1 [Source:MGI Symbol;Acc:MGI:1298366]                             |
| ENSMUSG00000029804 | Herc3   | 3.028027    | 6.355434    | -1.069612578 | 2.99E-08    | 8.38E-07    | down | hect domain and RLD 3 [Source:MGI Symbol;Acc:MGI:1921248]                                         |
| ENSMUSG00000015357 | Clpx    | 3.392466333 | 7.120388667 | -1.069621494 | 1.50E-05    | 0.000202148 | down | caseinolytic mitochondrial matrix peptidase chaperone subunit [Source:MGI Symbol;Acc:MGI:1346017] |
| ENSMUSG00000050931 | Sgms2   | 4.474035    | 9.394073    | -1.070174262 | 4.19E-09    | 1.46E-07    | down | sphingomyelin synthase 2 [Source:MGI Symbol;Acc:MGI:1921692]                                      |
| ENSMUSG00000032217 | Rnfl11  | 2.805572    | 5.895115667 | -1.071225183 | 1.21E-07    | 2.89E-06    | down | ring finger 111 [Source:MGI Symbol;Acc:MGI:1934919]                                               |
| ENSMUSG00000030315 | Vgll4   | 17.40080533 | 36.57989833 | -1.071896988 | 3.90E-09    | 1.37E-07    | down | vestigial like family member 4 [Source:MGI Symbol;Acc:MGI:2652840]                                |
| ENSMUSG00000032328 | Tmem30a | 5.560762333 | 11.6965     | -1.072722307 | 1.20E-09    | 4.68E-08    | down | transmembrane protein 30A [Source:MGI Symbol;Acc:MGI:106402]                                      |
| ENSMUSG00000059890 | Ube4a   | 3.123916333 | 6.570947333 | -1.072745564 | 1.78E-06    | 3.09E-05    | down | ubiquitination factor E4A [Source:MGI Symbol;Acc:MGI:2154580]                                     |
| ENSMUSG00000035783 | Acta2   | 64.87809367 | 136.468646  | -1.072766192 | 8.68E-13    | 5.91E-11    | down | actin, alpha 2, smooth muscle, aorta [Source:MGI Symbol;Acc:MGI:87909]                            |
| ENSMUSG00000036990 | Otu4    | 2.800903    | 5.894721667 | -1.073531673 | 7.11E-08    | 1.80E-06    | down | OTU domain containing 4 [Source:MGI Symbol;Acc:MGI:1098801]                                       |
| ENSMUSG00000025921 | Rdh10   | 3.038732667 | 6.405507333 | -1.075843081 | 5.80E-06    | 8.81E-05    | down | retinol dehydrogenase 10 (all-trans) [Source:MGI Symbol;Acc:MGI:1924238]                          |
| ENSMUSG00000021699 | Pde4d   | 2.962001333 | 6.254254    | -1.078265522 | 8.87E-06    | 0.000128516 | down | phosphodiesterase 4D, cAMP specific [Source:MGI Symbol;Acc:MGI:99555]                             |
| ENSMUSG00000029287 | Tgfbr3  | 8.709248333 | 18.393934   | -1.078609954 | 5.62E-10    | 2.38E-08    | down | transforming growth factor, beta receptor III [Source:MGI Symbol;Acc:MGI:104637]                  |
| ENSMUSG00000058587 | Tmod3   | 6.860148333 | 14.493286   | -1.079073052 | 3.32E-08    | 9.21E-07    | down | tropomodulin 3 [Source:MGI Symbol;Acc:MGI:1355315]                                                |
| ENSMUSG00000000355 | Mets1   | 13.56267533 | 28.75383033 | -1.084112364 | 6.85E-06    | 0.000101988 | down | malignant T cell amplified sequence 1 [Source:MGI Symbol;Acc:MGI:1916245]                         |
| ENSMUSG00000001864 | Aif1l   | 18.23636767 | 38.67853667 | -1.084714813 | 1.99E-13    | 1.52E-11    | down | allograft inflammatory factor 1-like [Source:MGI Symbol;Acc:MGI:1919598]                          |

|                     |               |             |             |              |             |             |      |                                                                                                                  |
|---------------------|---------------|-------------|-------------|--------------|-------------|-------------|------|------------------------------------------------------------------------------------------------------------------|
| ENSMUSG00000026885  | Tlll1         | 5.887754    | 12.49366333 | -1.08540726  | 0.001361424 | 0.008802075 | down | tubulin tyrosine ligase-like family, member 11 [Source:MGI Symbol;Acc:MGI:1921660]                               |
| ENSMUSG00000026414  | Tnnt2         | 2.653534667 | 5.630852667 | -1.085438006 | 0.005590663 | 0.026967337 | down | troponin T2, cardiac [Source:MGI Symbol;Acc:MGI:104597]                                                          |
| ENSMUSG00000059456  | Ptk2b         | 12.28295367 | 26.11952267 | -1.088471006 | 5.18E-10    | 2.24E-08    | down | PTK2 protein tyrosine kinase 2 beta [Source:MGI Symbol;Acc:MGI:104908]                                           |
| ENSMUSG00000032290  | Ptpn9         | 8.38569     | 17.83328567 | -1.088571132 | 3.61E-09    | 1.28E-07    | down | protein tyrosine phosphatase, non-receptor type 9 [Source:MGI Symbol;Acc:MGI:1928376]                            |
| ENSMUSG00000004936  | Map2k1        | 29.079654   | 61.995064   | -1.09214325  | 8.13E-11    | 3.99E-09    | down | mitogen-activated protein kinase kinase 1 [Source:MGI Symbol;Acc:MGI:1346866]                                    |
| ENSMUSG00000032601  | Prkar2a       | 10.914827   | 23.30364833 | -1.094266572 | 1.84E-07    | 4.16E-06    | down | protein kinase, cAMP dependent regulatory, type II alpha [Source:MGI Symbol;Acc:MGI:108025]                      |
| ENSMUSG00000028967  | Errfi1        | 14.97267833 | 31.97713133 | -1.094708205 | 1.68E-08    | 5.04E-07    | down | ERBB receptor feedback inhibitor 1 [Source:MGI Symbol;Acc:MGI:1921405]                                           |
| ENSMUSG00000020911  | Krt19         | 37.295171   | 79.657028   | -1.094812812 | 1.12E-09    | 4.41E-08    | down | keratin 19 [Source:MGI Symbol;Acc:MGI:96693]                                                                     |
| ENSMUSG00000029422  | Rsrc2         | 4.173066333 | 8.914540333 | -1.095052556 | 0.000256185 | 0.002242983 | down | arginine/serine-rich coiled-coil 2 [Source:MGI Symbol;Acc:MGI:1913489]                                           |
| ENSMUSG00000032911  | Cspg4         | 20.96138067 | 44.793523   | -1.095556392 | 4.26E-10    | 1.87E-08    | down | chondroitin sulfate proteoglycan 4 [Source:MGI Symbol;Acc:MGI:2153093]                                           |
| ENSMUSG00000028163  | Nfkb1         | 31.51435833 | 67.40995533 | -1.096952381 | 4.14E-07    | 8.56E-06    | down | nuclear factor of kappa light polypeptide gene enhancer in B cells 1, p105 [Source:MGI Symbol;Acc:MGI:97312]     |
| ENSMUSG00000045328  | Cenpe         | 2.415639667 | 5.169055333 | -1.097495378 | 6.41E-05    | 0.000688441 | down | centromere protein E [Source:MGI Symbol;Acc:MGI:1098230]                                                         |
| ENSMUSG00000026749  | Nek6          | 6.580436333 | 14.086874   | -1.098096347 | 1.50E-05    | 0.000201891 | down | NIMA (never in mitosis gene a)-related expressed kinase 6 [Source:MGI Symbol;Acc:MGI:1891638]                    |
| ENSMUSG00000030551  | Nr2f2         | 4.324273    | 9.280093667 | -1.101681761 | 1.41E-10    | 6.59E-09    | down | nuclear receptor subfamily 2, group F, member 2 [Source:MGI Symbol;Acc:MGI:1352452]                              |
| ENSMUSG00000033031  | C330027C09Rik | 3.816881667 | 8.192496333 | -1.101908662 | 6.49E-06    | 9.73E-05    | down | cell proliferation regulating inhibitor of protein phosphatase 2A [Source:MGI Symbol;Acc:MGI:2146335]            |
| ENSMUSG00000038095  | Sbno1         | 3.283807    | 7.058972667 | -1.104088897 | 0.000148675 | 0.001412145 | down | strawberry notch 1 [Source:MGI Symbol;Acc:MGI:2384298]                                                           |
| ENSMUSG00000027309  | 4930402H24Rik | 4.889160333 | 10.52051867 | -1.10554721  | 5.63E-08    | 1.48E-06    | down | RIKEN cDNA 4930402H24 gene [Source:MGI Symbol;Acc:MGI:1923029]                                                   |
| ENSMUSG00000052299  | Ltn1          | 3.422831333 | 7.367719    | -1.106027837 | 7.26E-08    | 1.84E-06    | down | listerin E3 ubiquitin protein ligase 1 [Source:MGI Symbol;Acc:MGI:1926163]                                       |
| ENSMUSG00000026944  | Abca2         | 9.444024333 | 20.337839   | -1.10669273  | 6.31E-10    | 2.61E-08    | down | ATP-binding cassette, sub-family A (ABC1), member 2 [Source:MGI Symbol;Acc:MGI:99606]                            |
| ENSMUSG00000044813  | Shb           | 15.348581   | 33.060248   | -1.106992265 | 1.71E-08    | 5.09E-07    | down | src homology 2 domain-containing transforming protein B [Source:MGI Symbol;Acc:MGI:98294]                        |
| ENSMUSG00000021408  | Ripk1         | 2.917630333 | 6.284756667 | -1.107059783 | 5.73E-05    | 0.000625051 | down | receptor (TNFRSF)-interacting serine-threonine kinase 1 [Source:MGI Symbol;Acc:MGI:108212]                       |
| ENSMUSG00000085666  | Gm9855        | 9.470799    | 20.40264733 | -1.107198312 | 9.00E-06    | 0.000129914 | down | predicted pseudogene 9855 [Source:MGI Symbol;Acc:MGI:3704357]                                                    |
| ENSMUSG00000035725  | Prkx          | 2.783541333 | 5.998012    | -1.107562902 | 6.27E-07    | 1.25E-05    | down | protein kinase, X-linked [Source:MGI Symbol;Acc:MGI:1309999]                                                     |
| ENSMUSG00000028970  | Abcb1b        | 3.291535    | 7.096071667 | -1.108260042 | 6.91E-08    | 1.76E-06    | down | ATP-binding cassette, sub-family B (MDR/TAP), member 1B [Source:MGI Symbol;Acc:MGI:97568]                        |
| ENSMUSG00000020954  | Strn3         | 2.43803     | 5.259077    | -1.109093742 | 0.000403025 | 0.003260817 | down | striatin, calmodulin binding protein 3 [Source:MGI Symbol;Acc:MGI:2151064]                                       |
| ENSMUSG00000032340  | Neo1          | 11.41763    | 24.642676   | -1.109895714 | 5.02E-14    | 4.06E-12    | down | neogenin [Source:MGI Symbol;Acc:MGI:1097159]                                                                     |
| ENSMUSG00000027340  | Slc23a2       | 6.137302    | 13.25746533 | -1.111128495 | 1.02E-12    | 6.81E-11    | down | solute carrier family 23 (nucleobase transporters), member 2 [Source:MGI Symbol;Acc:MGI:1859682]                 |
| ENSMUSG00000021360  | Gent2         | 2.649697333 | 5.724407667 | -1.111298843 | 1.79E-05    | 0.000236716 | down | glucosaminyl (N-acetyl) transferase 2, 1-branching enzyme [Source:MGI Symbol;Acc:MGI:1100870]                    |
| ENSMUSG00000031596  | Slc7a2        | 4.951697    | 10.70308033 | -1.11203112  | 0.000361304 | 0.002981755 | down | solute carrier family 7 (cationic amino acid transporter, y+ system), member 2 [Source:MGI Symbol;Acc:MGI:99828] |
| ENSMUSG000000041219 | Arhgap11a     | 2.489742333 | 5.384863667 | -1.112913376 | 0.000238591 | 0.002116132 | down | Rho GTPase activating protein 11A [Source:MGI Symbol;Acc:MGI:2444300]                                            |

|                    |               |             |             |              |             |             |      |                                                                                             |
|--------------------|---------------|-------------|-------------|--------------|-------------|-------------|------|---------------------------------------------------------------------------------------------|
| ENSMUSG00000075703 | Selenoi       | 2.559814667 | 5.544008667 | -1.114890151 | 2.13E-05    | 0.000274117 | down | selenoprotein I [Source:MGI Symbol;Acc:MGI:107898]                                          |
| ENSMUSG00000015702 | Anxa9         | 4.207433333 | 9.128140333 | -1.117380559 | 1.26E-06    | 2.29E-05    | down | annexin A9 [Source:MGI Symbol;Acc:MGI:1923711]                                              |
| ENSMUSG00000033004 | Mycbp2        | 3.050588    | 6.628443    | -1.119582677 | 0.00029783  | 0.002540875 | down | MYC binding protein 2, E3 ubiquitin protein ligase [Source:MGI Symbol;Acc:MGI:2179432]      |
| ENSMUSG00000036712 | Cyld          | 2.326505667 | 5.065679667 | -1.122591149 | 2.29E-07    | 5.04E-06    | down | CYLD lysine 63 deubiquitinase [Source:MGI Symbol;Acc:MGI:1921506]                           |
| ENSMUSG00000026166 | Ccl20         | 16.74770367 | 36.48516067 | -1.12334651  | 2.13E-07    | 4.75E-06    | down | chemokine (C-C motif) ligand 20 [Source:MGI Symbol;Acc:MGI:1329031]                         |
| ENSMUSG00000049866 | Arl4c         | 14.49633333 | 31.684805   | -1.128103102 | 1.03E-11    | 5.91E-10    | down | ADP-ribosylation factor-like 4C [Source:MGI Symbol;Acc:MGI:2445172]                         |
| ENSMUSG00000038181 | Chpf2         | 9.253414667 | 20.35145267 | -1.137074028 | 1.20E-07    | 2.86E-06    | down | chondroitin polymerizing factor 2 [Source:MGI Symbol;Acc:MGI:1917522]                       |
| ENSMUSG00000032254 | Kif23         | 15.75485967 | 34.71317933 | -1.139686602 | 1.53E-12    | 9.95E-11    | down | kinesin family member 23 [Source:MGI Symbol;Acc:MGI:1919069]                                |
| ENSMUSG00000022822 | Abcc5         | 9.530622333 | 21.00042533 | -1.13977622  | 7.91E-12    | 4.62E-10    | down | ATP-binding cassette, sub-family C (CFTR/MRP), member 5 [Source:MGI Symbol;Acc:MGI:1351644] |
| ENSMUSG00000022146 | Osmr          | 4.518620333 | 9.959672333 | -1.140215936 | 6.20E-08    | 1.60E-06    | down | oncostatin M receptor [Source:MGI Symbol;Acc:MGI:1330819]                                   |
| ENSMUSG00000012443 | Kif11         | 4.817898    | 10.636066   | -1.142488879 | 1.26E-05    | 0.000175011 | down | kinesin family member 11 [Source:MGI Symbol;Acc:MGI:1098231]                                |
| ENSMUSG00000036591 | Arhgap21      | 2.662982667 | 5.890491    | -1.145344856 | 2.78E-17    | 3.28E-15    | down | Rho GTPase activating protein 21 [Source:MGI Symbol;Acc:MGI:1918685]                        |
| ENSMUSG00000028649 | Macf1         | 2.970286    | 6.570999333 | -1.145510945 | 2.39E-06    | 4.03E-05    | down | microtubule-actin crosslinking factor 1 [Source:MGI Symbol;Acc:MGI:108559]                  |
| ENSMUSG00000036777 | Anln          | 26.82651633 | 59.36587267 | -1.145974095 | 3.26E-14    | 2.70E-12    | down | anillin, actin binding protein [Source:MGI Symbol;Acc:MGI:1920174]                          |
| ENSMUSG00000027962 | Vcam1         | 10.56461833 | 23.38178233 | -1.146144259 | 2.61E-09    | 9.50E-08    | down | vascular cell adhesion molecule 1 [Source:MGI Symbol;Acc:MGI:98926]                         |
| ENSMUSG00000042499 | Hoxd11        | 20.688383   | 45.843797   | -1.147905651 | 2.44E-11    | 1.30E-09    | down | homeobox D11 [Source:MGI Symbol;Acc:MGI:96203]                                              |
| ENSMUSG00000032932 | Hspa13        | 4.641241667 | 10.28915033 | -1.148541126 | 1.12E-07    | 2.70E-06    | down | heat shock protein 70 family, member 13 [Source:MGI Symbol;Acc:MGI:1309463]                 |
| ENSMUSG00000030659 | Nucb2         | 4.426216    | 9.823547333 | -1.150170227 | 1.74E-06    | 3.03E-05    | down | nucleobindin 2 [Source:MGI Symbol;Acc:MGI:1858179]                                          |
| ENSMUSG00000026875 | Traf1         | 3.12223     | 6.931041667 | -1.150495374 | 0.000657052 | 0.004864109 | down | TNF receptor-associated factor 1 [Source:MGI Symbol;Acc:MGI:101836]                         |
| ENSMUSG00000006423 | C330007P06Rik | 2.969921333 | 6.595944333 | -1.151154505 | 6.00E-07    | 1.20E-05    | down | RIKEN cDNA C330007P06 gene [Source:MGI Symbol;Acc:MGI:1924894]                              |
| ENSMUSG00000030707 | Coro1a        | 3.619454667 | 8.048137    | -1.152882517 | 0.008002719 | 0.035752168 | down | coronin, actin binding protein 1A [Source:MGI Symbol;Acc:MGI:1345961]                       |
| ENSMUSG00000020048 | Hsp90b1       | 92.34025833 | 205.907323  | -1.156963466 | 1.35E-09    | 5.19E-08    | down | heat shock protein 90, beta (Grp94), member 1 [Source:MGI Symbol;Acc:MGI:98817]             |
| ENSMUSG00000001173 | Ocr1          | 2.460599    | 5.488859    | -1.157496716 | 9.12E-07    | 1.73E-05    | down | OCR1, inositol polyphosphate-5-phosphatase [Source:MGI Symbol;Acc:MGI:109589]               |
| ENSMUSG00000052397 | Ezr           | 88.26629633 | 197.036855  | -1.158530937 | 4.47E-16    | 4.58E-14    | down | ezrin [Source:MGI Symbol;Acc:MGI:98931]                                                     |
| ENSMUSG00000024423 | Impact        | 5.965535333 | 13.32343167 | -1.159242207 | 4.15E-08    | 1.13E-06    | down | impact, RWD domain protein [Source:MGI Symbol;Acc:MGI:1098233]                              |
| ENSMUSG00000032085 | Tagln         | 9.688108333 | 21.64669733 | -1.159860025 | 6.14E-09    | 2.02E-07    | down | transgelin [Source:MGI Symbol;Acc:MGI:106012]                                               |
| ENSMUSG00000071552 | Tigit         | 5.528365333 | 12.45095233 | -1.171331231 | 5.47E-05    | 0.00060322  | down | T cell immunoreceptor with Ig and ITIM domains [Source:MGI Symbol;Acc:MGI:3642260]          |
| ENSMUSG00000049550 | Clip1         | 6.758682667 | 15.25122267 | -1.174110922 | 4.09E-12    | 2.48E-10    | down | CAP-GLY domain containing linker protein 1 [Source:MGI Symbol;Acc:MGI:1928401]              |
| ENSMUSG00000037072 | Selenof       | 199.7374013 | 451.272054  | -1.175892933 | 1.21E-09    | 4.72E-08    | down | selenoprotein F [Source:MGI Symbol;Acc:MGI:1927947]                                         |
| ENSMUSG00000056234 | Ncoa4         | 5.754774    | 13.016395   | -1.17749876  | 1.15E-07    | 2.76E-06    | down | nuclear receptor coactivator 4 [Source:MGI Symbol;Acc:MGI:1350932]                          |

|                    |          |             |             |              |             |             |      |                                                                                                                                       |
|--------------------|----------|-------------|-------------|--------------|-------------|-------------|------|---------------------------------------------------------------------------------------------------------------------------------------|
| ENSMUSG00000022710 | Usp7     | 10.91475767 | 24.76517367 | -1.182032639 | 4.72E-15    | 4.38E-13    | down | ubiquitin specific peptidase 7 [Source:MGI Symbol;Acc:MGI:2182061]                                                                    |
| ENSMUSG00000032097 | Ddx6     | 5.153083    | 11.710458   | -1.184289766 | 3.60E-07    | 7.57E-06    | down | DEAD (Asp-Glu-Ala-Asp) box polypeptide 6 [Source:MGI Symbol;Acc:MGI:104976]                                                           |
| ENSMUSG00000024164 | C3       | 30.22865233 | 68.75358333 | -1.185518245 | 6.39E-11    | 3.19E-09    | down | complement component 3 [Source:MGI Symbol;Acc:MGI:88227]                                                                              |
| ENSMUSG00000019230 | Lhx9     | 4.027474667 | 9.161447333 | -1.18570002  | 6.43E-12    | 3.80E-10    | down | LIM homeobox protein 9 [Source:MGI Symbol;Acc:MGI:1316721]                                                                            |
| ENSMUSG00000053522 | Lgals7   | 5.672624333 | 12.91653367 | -1.187130724 | 0.001387609 | 0.008912316 | down | lectin, galactose binding, soluble 7 [Source:MGI Symbol;Acc:MGI:1316742]                                                              |
| ENSMUSG00000024614 | Tmx3     | 2.401286667 | 5.468906    | -1.187444622 | 1.36E-06    | 2.45E-05    | down | thioredoxin-related transmembrane protein 3 [Source:MGI Symbol;Acc:MGI:2442418]                                                       |
| ENSMUSG00000037010 | Apln     | 21.40034033 | 48.76679633 | -1.188265459 | 3.43E-15    | 3.27E-13    | down | apelin [Source:MGI Symbol;Acc:MGI:1353624]                                                                                            |
| ENSMUSG00000061273 | Mmgt1    | 2.27032     | 5.181100333 | -1.190362863 | 4.64E-07    | 9.51E-06    | down | membrane magnesium transporter 1 [Source:MGI Symbol;Acc:MGI:2384305]                                                                  |
| ENSMUSG00000050953 | Gja1     | 53.16828433 | 121.589714  | -1.193383369 | 9.33E-15    | 8.45E-13    | down | gap junction protein, alpha 1 [Source:MGI Symbol;Acc:MGI:95713]                                                                       |
| ENSMUSG00000024512 | Dynap    | 2.509803    | 5.747673333 | -1.195394905 | 0.000274128 | 0.002373954 | down | dynactin associated protein [Source:MGI Symbol;Acc:MGI:1922827]                                                                       |
| ENSMUSG00000085787 | Gm13092  | 30.79804933 | 71.005381   | -1.205089383 | 2.43E-06    | 4.08E-05    | down | predicted gene 13092 [Source:MGI Symbol;Acc:MGI:3649661]                                                                              |
| ENSMUSG00000006134 | Crkl     | 4.527313    | 10.44275167 | -1.205774955 | 4.71E-08    | 1.26E-06    | down | v-crk avian sarcoma virus CT10 oncogene homolog-like [Source:MGI Symbol;Acc:MGI:104686]                                               |
| ENSMUSG00000025240 | Sacm11   | 2.789481667 | 6.438422667 | -1.20671022  | 4.61E-07    | 9.48E-06    | down | SAC1 suppressor of actin mutations 1-like (yeast) [Source:MGI Symbol;Acc:MGI:1933169]                                                 |
| ENSMUSG00000027699 | Ect2     | 4.953311333 | 11.45202433 | -1.209137433 | 2.32E-07    | 5.09E-06    | down | ect2 oncogene [Source:MGI Symbol;Acc:MGI:95281]                                                                                       |
| ENSMUSG00000031278 | AcsL4    | 2.873490333 | 6.645666667 | -1.209609736 | 2.42E-06    | 4.06E-05    | down | acyl-CoA synthetase long-chain family member 4 [Source:MGI Symbol;Acc:MGI:1354713]                                                    |
| ENSMUSG00000032376 | Usp3     | 3.734559667 | 8.66218     | -1.213792004 | 2.07E-05    | 0.000268229 | down | ubiquitin specific peptidase 3 [Source:MGI Symbol;Acc:MGI:2152450]                                                                    |
| ENSMUSG00000026718 | Stam     | 3.330197333 | 7.756327    | -1.21976596  | 8.50E-05    | 0.000875849 | down | signal transducing adaptor molecule (SH3 domain and ITAM motif) 1 [Source:MGI Symbol;Acc:MGI:1329014]                                 |
| ENSMUSG00000041124 | Msantd4  | 2.598884    | 6.077478333 | -1.225580604 | 1.84E-06    | 3.19E-05    | down | Myb/SANT-like DNA-binding domain containing 4 with coiled-coils [Source:MGI Symbol;Acc:MGI:1925350]                                   |
| ENSMUSG00000029657 | Hsph1    | 20.225419   | 47.33913167 | -1.226863653 | 3.17E-12    | 1.94E-10    | down | heat shock 105kDa/110kDa protein 1 [Source:MGI Symbol;Acc:MGI:105053]                                                                 |
| ENSMUSG00000036550 | Cnot1    | 15.36688267 | 35.97967067 | -1.227357452 | 6.60E-18    | 8.21E-16    | down | CCR4-NOT transcription complex, subunit 1 [Source:MGI Symbol;Acc:MGI:2442402]                                                         |
| ENSMUSG00000040274 | Cdk6     | 3.893002667 | 9.157615333 | -1.234088633 | 5.35E-10    | 2.28E-08    | down | cyclin-dependent kinase 6 [Source:MGI Symbol;Acc:MGI:1277162]                                                                         |
| ENSMUSG00000068798 | Rap1a    | 7.777355667 | 18.30886    | -1.235190343 | 8.70E-06    | 0.000126774 | down | RAS-related protein 1a [Source:MGI Symbol;Acc:MGI:97852]                                                                              |
| ENSMUSG00000021285 | Ppp1r13b | 3.184011    | 7.511115    | -1.238181767 | 3.58E-08    | 9.87E-07    | down | protein phosphatase 1, regulatory subunit 13B [Source:MGI Symbol;Acc:MGI:1336199]                                                     |
| ENSMUSG00000078350 | Smim1    | 3.579626333 | 8.458024    | -1.240511657 | 0.000896552 | 0.006236469 | down | small integral membrane protein 1 [Source:MGI Symbol;Acc:MGI:1916109]                                                                 |
| ENSMUSG00000033985 | Tesk2    | 4.606413333 | 10.88650533 | -1.240825135 | 2.84E-09    | 1.02E-07    | down | testis-specific kinase 2 [Source:MGI Symbol;Acc:MGI:2385204]                                                                          |
| ENSMUSG00000031715 | Smarca5  | 5.468655333 | 12.944783   | -1.243112738 | 2.39E-05    | 0.000302933 | down | SWI/SNF related, matrix associated, actin dependent regulator of chromatin, subfamily a, member 5 [Source:MGI Symbol;Acc:MGI:1935129] |
| ENSMUSG00000043336 | Filip11  | 7.786627333 | 18.47712    | -1.246669418 | 9.21E-10    | 3.72E-08    | down | filamin A interacting protein 1-like [Source:MGI Symbol;Acc:MGI:1925999]                                                              |
| ENSMUSG00000063406 | Tmed5    | 4.076294333 | 9.691711333 | -1.249493208 | 5.21E-08    | 1.38E-06    | down | transmembrane p24 trafficking protein 5 [Source:MGI Symbol;Acc:MGI:1921586]                                                           |
| ENSMUSG00000049858 | Suox     | 34.34635133 | 81.67903667 | -1.249809004 | 1.15E-16    | 1.25E-14    | down | sulfite oxidase [Source:MGI Symbol;Acc:MGI:2446117]                                                                                   |

|                    |         |             |             |              |             |             |      |                                                                                                             |
|--------------------|---------|-------------|-------------|--------------|-------------|-------------|------|-------------------------------------------------------------------------------------------------------------|
| ENSMUSG00000027306 | Nusap1  | 5.383249667 | 12.80654233 | -1.25033177  | 1.33E-10    | 6.30E-09    | down | nucleolar and spindle associated protein 1 [Source:MGI Symbol;Acc:MGI:2675669]                              |
| ENSMUSG00000054693 | Adam10  | 4.105676667 | 9.770231    | -1.250772657 | 1.64E-07    | 3.78E-06    | down | a disintegrin and metallopeptidase domain 10 [Source:MGI Symbol;Acc:MGI:109548]                             |
| ENSMUSG00000031538 | Plat    | 10.12336067 | 24.10108467 | -1.251409773 | 2.04E-12    | 1.29E-10    | down | plasminogen activator, tissue [Source:MGI Symbol;Acc:MGI:97610]                                             |
| ENSMUSG00000014496 | Ankrd28 | 2.908316    | 6.927626333 | -1.252177083 | 5.08E-09    | 1.72E-07    | down | ankyrin repeat domain 28 [Source:MGI Symbol;Acc:MGI:2145661]                                                |
| ENSMUSG00000020248 | Nfyb    | 4.081538667 | 9.741511333 | -1.25503249  | 1.10E-07    | 2.67E-06    | down | nuclear transcription factor-Y beta [Source:MGI Symbol;Acc:MGI:97317]                                       |
| ENSMUSG00000022136 | Dnajc3  | 4.532289333 | 10.852186   | -1.259673812 | 3.84E-08    | 1.05E-06    | down | DnaJ heat shock protein family (Hsp40) member C3 [Source:MGI Symbol;Acc:MGI:107373]                         |
| ENSMUSG00000027358 | Bmp2    | 6.908762333 | 16.550305   | -1.260358616 | 1.40E-12    | 9.25E-11    | down | bone morphogenetic protein 2 [Source:MGI Symbol;Acc:MGI:88177]                                              |
| ENSMUSG00000022801 | Lrch3   | 3.162571    | 7.579311333 | -1.2609689   | 3.79E-06    | 6.08E-05    | down | leucine-rich repeats and calponin homology (CH) domain containing 3 [Source:MGI Symbol;Acc:MGI:1917394]     |
| ENSMUSG00000049076 | Acap2   | 3.724094667 | 8.967245333 | -1.267775122 | 1.55E-09    | 5.90E-08    | down | ArfGAP with coiled-coil, ankyrin repeat and PH domains 2 [Source:MGI Symbol;Acc:MGI:1925868]                |
| ENSMUSG00000034855 | Cxcl10  | 41.87881467 | 100.955823  | -1.269431612 | 2.70E-18    | 3.50E-16    | down | chemokine (C-X-C motif) ligand 10 [Source:MGI Symbol;Acc:MGI:1352450]                                       |
| ENSMUSG00000022021 | Diaph3  | 4.381977    | 10.60203167 | -1.274686938 | 1.87E-05    | 0.000245484 | down | diaphanous related formin 3 [Source:MGI Symbol;Acc:MGI:1927222]                                             |
| ENSMUSG00000029863 | Casp2   | 3.494311667 | 8.513507    | -1.284745257 | 7.45E-05    | 0.000780702 | down | caspace 2 [Source:MGI Symbol;Acc:MGI:97295]                                                                 |
| ENSMUSG00000024989 | Cep55   | 3.285682333 | 8.023179333 | -1.28798104  | 0.001626868 | 0.010141718 | down | centrosomal protein 55 [Source:MGI Symbol;Acc:MGI:1921357]                                                  |
| ENSMUSG00000039285 | Azi2    | 3.726930667 | 9.115008    | -1.290255942 | 0.000184026 | 0.001704525 | down | 5-azacytidine induced gene 2 [Source:MGI Symbol;Acc:MGI:1351332]                                            |
| ENSMUSG00000049670 | Morn4   | 5.309108667 | 13.04440233 | -1.296889269 | 3.70E-09    | 1.31E-07    | down | MORN repeat containing 4 [Source:MGI Symbol;Acc:MGI:2449568]                                                |
| ENSMUSG00000042570 | Mier2   | 15.26187233 | 37.50875233 | -1.297295311 | 9.14E-06    | 0.000131212 | down | MIER family member 2 [Source:MGI Symbol;Acc:MGI:1917677]                                                    |
| ENSMUSG00000040549 | Ckap5   | 6.384289333 | 15.69191533 | -1.297423516 | 2.67E-11    | 1.41E-09    | down | cytoskeleton associated protein 5 [Source:MGI Symbol;Acc:MGI:1923036]                                       |
| ENSMUSG00000095362 | Gm14325 | 2.553486    | 6.279526    | -1.298187514 | 0.011495908 | 0.047341854 | down | predicted gene 14325 [Source:MGI Symbol;Acc:MGI:3702875]                                                    |
| ENSMUSG00000031246 | Sh3bgr1 | 3.850333    | 9.488327    | -1.301170507 | 5.34E-10    | 2.28E-08    | down | SH3-binding domain glutamic acid-rich protein like [Source:MGI Symbol;Acc:MGI:1930849]                      |
| ENSMUSG00000021796 | Bmpr1a  | 2.810005333 | 6.936050667 | -1.303541569 | 4.50E-06    | 7.01E-05    | down | bone morphogenetic protein receptor, type 1A [Source:MGI Symbol;Acc:MGI:1338938]                            |
| ENSMUSG00000022770 | Dlg1    | 3.950797667 | 9.764737667 | -1.305437323 | 2.20E-05    | 0.000282195 | down | discs large MAGUK scaffold protein 1 [Source:MGI Symbol;Acc:MGI:107231]                                     |
| ENSMUSG00000037643 | Prkci   | 4.247334333 | 10.51999767 | -1.308504803 | 1.94E-11    | 1.05E-09    | down | protein kinase C, iota [Source:MGI Symbol;Acc:MGI:99260]                                                    |
| ENSMUSG00000092686 | Gm25745 | 25.86694133 | 64.14554333 | -1.310239563 | 0.000423049 | 0.003403501 | down | predicted gene, 25745 [Source:MGI Symbol;Acc:MGI:5455522]                                                   |
| ENSMUSG00000024085 | Man2a1  | 2.213681667 | 5.512152667 | -1.316168072 | 8.31E-11    | 4.07E-09    | down | mannosidase 2, alpha 1 [Source:MGI Symbol;Acc:MGI:104669]                                                   |
| ENSMUSG00000020170 | Frs2    | 3.939105    | 9.821686333 | -1.318102876 | 1.80E-15    | 1.74E-13    | down | fibroblast growth factor receptor substrate 2 [Source:MGI Symbol;Acc:MGI:1100860]                           |
| ENSMUSG00000035247 | Hectd1  | 2.055395667 | 5.158825    | -1.327626366 | 6.07E-10    | 2.53E-08    | down | HECT domain E3 ubiquitin protein ligase 1 [Source:MGI Symbol;Acc:MGI:2384768]                               |
| ENSMUSG00000027287 | Snap23  | 2.549930333 | 6.403637667 | -1.328433847 | 4.85E-06    | 7.48E-05    | down | synaptosomal-associated protein 23 [Source:MGI Symbol;Acc:MGI:109356]                                       |
| ENSMUSG00000063873 | Slc24a3 | 3.997940667 | 10.04789133 | -1.329563801 | 6.99E-13    | 4.81E-11    | down | solute carrier family 24 (sodium/potassium/calcium exchanger), member 3 [Source:MGI Symbol;Acc:MGI:2137513] |
| ENSMUSG00000033542 | Arhgef5 | 7.324835333 | 18.466598   | -1.334049879 | 4.56E-17    | 5.20E-15    | down | Rho guanine nucleotide exchange factor (GEF) 5 [Source:MGI Symbol;Acc:MGI:1858952]                          |
| ENSMUSG00000022546 | Gpt     | 31.33982967 | 79.11193333 | -1.33589799  | 4.88E-17    | 5.50E-15    | down | glutamic pyruvic transaminase, soluble [Source:MGI Symbol;Acc:MGI:95802]                                    |

|                    |               |             |             |              |             |             |      |                                                                                                          |
|--------------------|---------------|-------------|-------------|--------------|-------------|-------------|------|----------------------------------------------------------------------------------------------------------|
| ENSMUSG00000037697 | Ddhd1         | 2.528707333 | 6.387987667 | -1.336961455 | 4.93E-05    | 0.000554193 | down | DDHD domain containing 1 [Source:MGI Symbol;Acc:MGI:2150302]                                             |
| ENSMUSG00000022912 | Pros1         | 15.211077   | 38.51128133 | -1.34015882  | 2.45E-10    | 1.10E-08    | down | protein S (alpha) [Source:MGI Symbol;Acc:MGI:1095733]                                                    |
| ENSMUSG00000031125 | 3830403N18Rik | 3.50861     | 8.897129    | -1.342440277 | 3.79E-05    | 0.000444283 | down | RIKEN cDNA 3830403N18 gene [Source:MGI Symbol;Acc:MGI:1917941]                                           |
| ENSMUSG00000039911 | Spsb1         | 2.237681333 | 5.679148333 | -1.343669996 | 1.78E-07    | 4.04E-06    | down | splA/ryanodine receptor domain and SOCS box containing 1 [Source:MGI Symbol;Acc:MGI:1921896]             |
| ENSMUSG00000019861 | Gopc          | 4.120950667 | 10.52425467 | -1.352668967 | 8.60E-10    | 3.50E-08    | down | golgi associated PDZ and coiled-coil motif containing [Source:MGI Symbol;Acc:MGI:2149946]                |
| ENSMUSG00000020064 | Herc4         | 2.894166    | 7.406319    | -1.355609017 | 7.07E-05    | 0.000748509 | down | hect domain and RLD 4 [Source:MGI Symbol;Acc:MGI:1914595]                                                |
| ENSMUSG00000056758 | Hmga2         | 29.226406   | 75.01419567 | -1.359891206 | 3.53E-16    | 3.64E-14    | down | high mobility group AT-hook 2 [Source:MGI Symbol;Acc:MGI:101761]                                         |
| ENSMUSG00000038446 | Cdc40         | 2.558844333 | 6.569558667 | -1.360304072 | 1.95E-09    | 7.28E-08    | down | cell division cycle 40 [Source:MGI Symbol;Acc:MGI:1918963]                                               |
| ENSMUSG00000029377 | Ereg          | 4.157366667 | 10.67674933 | -1.360730568 | 1.96E-09    | 7.30E-08    | down | epiregulin [Source:MGI Symbol;Acc:MGI:107508]                                                            |
| ENSMUSG00000063767 | S100a7a       | 4.453687667 | 11.48241467 | -1.36635377  | 0.000232798 | 0.002070604 | down | S100 calcium binding protein A7A [Source:MGI Symbol;Acc:MGI:2687194]                                     |
| ENSMUSG00000028995 | Fam126a       | 2.042164333 | 5.279119667 | -1.370198404 | 1.91E-08    | 5.55E-07    | down | family with sequence similarity 126, member A [Source:MGI Symbol;Acc:MGI:2149839]                        |
| ENSMUSG00000031004 | Mki67         | 4.972138667 | 12.876563   | -1.372809125 | 0.006250458 | 0.029523676 | down | antigen identified by monoclonal antibody Ki 67 [Source:MGI Symbol;Acc:MGI:106035]                       |
| ENSMUSG00000051236 | Msrb3         | 3.795598667 | 9.888429    | -1.38141388  | 1.77E-09    | 6.66E-08    | down | methionine sulfoxide reductase B3 [Source:MGI Symbol;Acc:MGI:2443538]                                    |
| ENSMUSG0000005802  | Slc30a4       | 5.089785    | 13.27172833 | -1.382679639 | 1.81E-09    | 6.76E-08    | down | solute carrier family 30 (zinc transporter), member 4 [Source:MGI Symbol;Acc:MGI:1345282]                |
| ENSMUSG00000021466 | Ptch1         | 2.195217333 | 5.726518667 | -1.383294567 | 9.85E-08    | 2.40E-06    | down | patched 1 [Source:MGI Symbol;Acc:MGI:105373]                                                             |
| ENSMUSG00000019832 | Rab32         | 15.749282   | 41.14401133 | -1.385396398 | 9.52E-17    | 1.05E-14    | down | RAB32, member RAS oncogene family [Source:MGI Symbol;Acc:MGI:1915094]                                    |
| ENSMUSG00000022003 | Slc25a30      | 3.006520667 | 7.872758333 | -1.388774318 | 1.21E-05    | 0.000168308 | down | solute carrier family 25, member 30 [Source:MGI Symbol;Acc:MGI:1914804]                                  |
| ENSMUSG00000024778 | Fas           | 4.060849333 | 10.63690167 | -1.389224575 | 1.05E-06    | 1.95E-05    | down | Fas (TNF receptor superfamily member 6) [Source:MGI Symbol;Acc:MGI:95484]                                |
| ENSMUSG00000023087 | Noct          | 6.134502    | 16.21116833 | -1.401969934 | 2.00E-07    | 4.48E-06    | down | nocturnin [Source:MGI Symbol;Acc:MGI:109382]                                                             |
| ENSMUSG00000010080 | Epn3          | 15.82882733 | 41.856972   | -1.40291357  | 2.64E-13    | 1.98E-11    | down | epsin 3 [Source:MGI Symbol;Acc:MGI:1919139]                                                              |
| ENSMUSG00000022911 | Arl13b        | 3.171428    | 8.450779    | -1.413951747 | 5.19E-12    | 3.11E-10    | down | ADP-ribosylation factor-like 13B [Source:MGI Symbol;Acc:MGI:1915396]                                     |
| ENSMUSG00000063952 | Brpf3         | 2.541766667 | 6.798706667 | -1.419428728 | 3.79E-05    | 0.000444283 | down | bromodomain and PHD finger containing, 3 [Source:MGI Symbol;Acc:MGI:2146836]                             |
| ENSMUSG00000046056 | Sbsn          | 18.34331633 | 49.373812   | -1.428491545 | 3.45E-15    | 3.27E-13    | down | suprabasin [Source:MGI Symbol;Acc:MGI:2446326]                                                           |
| ENSMUSG00000022139 | Mbnl2         | 3.113996    | 8.431394333 | -1.437004144 | 1.27E-09    | 4.94E-08    | down | muscleblind like splicing factor 2 [Source:MGI Symbol;Acc:MGI:2145597]                                   |
| ENSMUSG00000031098 | Syt8          | 10.175537   | 27.584789   | -1.438768012 | 5.79E-10    | 2.44E-08    | down | synaptotagmin VIII [Source:MGI Symbol;Acc:MGI:1859867]                                                   |
| ENSMUSG00000038816 | Cttna1        | 2.495255333 | 6.795091    | -1.445305421 | 1.30E-11    | 7.38E-10    | down | catenin (cadherin associated protein), alpha-like 1 [Source:MGI Symbol;Acc:MGI:1859649]                  |
| ENSMUSG00000033581 | Igf2bp2       | 14.53981333 | 39.61113433 | -1.445897268 | 2.80E-10    | 1.25E-08    | down | insulin-like growth factor 2 mRNA binding protein 2 [Source:MGI Symbol;Acc:MGI:1890358]                  |
| ENSMUSG00000018263 | Tbx5          | 4.300427333 | 11.74636133 | -1.44966199  | 1.95E-12    | 1.24E-10    | down | T-box 5 [Source:MGI Symbol;Acc:MGI:102541]                                                               |
| ENSMUSG00000030116 | Mfap5         | 5.041614    | 13.84859167 | -1.457781698 | 6.78E-07    | 1.34E-05    | down | microfibrillar associated protein 5 [Source:MGI Symbol;Acc:MGI:1354387]                                  |
| ENSMUSG00000032902 | Slc16a1       | 15.65417733 | 43.01282867 | -1.458219318 | 5.57E-19    | 7.86E-17    | down | solute carrier family 16 (monocarboxylic acid transporters), member 1 [Source:MGI Symbol;Acc:MGI:106013] |

|                    |         |             |             |              |             |             |      |                                                                                                                           |
|--------------------|---------|-------------|-------------|--------------|-------------|-------------|------|---------------------------------------------------------------------------------------------------------------------------|
| ENSMUSG00000031095 | Cul4b   | 2.909232667 | 8.051318667 | -1.46858641  | 5.10E-11    | 2.57E-09    | down | cullin 4B [Source:MGI Symbol;Acc:MGI:1919834]                                                                             |
| ENSMUSG00000028073 | Pear1   | 3.361238667 | 9.340703    | -1.474538148 | 9.99E-09    | 3.16E-07    | down | platelet endothelial aggregation receptor 1 [Source:MGI Symbol;Acc:MGI:1920432]                                           |
| ENSMUSG00000095304 | Plac9a  | 8.62248     | 23.993442   | -1.476465353 | 5.63E-10    | 2.38E-08    | down | placenta specific 9a [Source:MGI Symbol;Acc:MGI:2663998]                                                                  |
| ENSMUSG0000005968  | Tuft1   | 5.953989667 | 16.63379767 | -1.482188965 | 2.04E-12    | 1.29E-10    | down | tuftelin 1 [Source:MGI Symbol;Acc:MGI:109572]                                                                             |
| ENSMUSG00000030717 | Nupr1   | 40.581584   | 113.6108807 | -1.485203927 | 4.35E-09    | 1.51E-07    | down | nuclear protein transcription regulator 1 [Source:MGI Symbol;Acc:MGI:1891834]                                             |
| ENSMUSG00000029372 | Ppbb    | 87.37073267 | 245.944575  | -1.493111239 | 1.86E-10    | 8.59E-09    | down | pro-platelet basic protein [Source:MGI Symbol;Acc:MGI:1888712]                                                            |
| ENSMUSG00000057969 | Sema3b  | 2.035932667 | 5.781453667 | -1.505742435 | 4.84E-11    | 2.45E-09    | down | sema domain, immunoglobulin domain (Ig), short basic domain, secreted, (semaphorin) 3B [Source:MGI Symbol;Acc:MGI:107561] |
| ENSMUSG00000106795 | Gm43050 | 6.704304667 | 19.091287   | -1.509754746 | 2.00E-07    | 4.48E-06    | down | predicted gene 43050 [Source:MGI Symbol;Acc:MGI:5663187]                                                                  |
| ENSMUSG00000032232 | Cgnl1   | 3.095267    | 8.816544667 | -1.51014949  | 2.23E-20    | 3.39E-18    | down | cingulin-like 1 [Source:MGI Symbol;Acc:MGI:1915428]                                                                       |
| ENSMUSG00000020312 | Shc2    | 7.230925333 | 20.66767133 | -1.515123663 | 1.73E-16    | 1.84E-14    | down | SHC (Src homology 2 domain containing) transforming protein 2 [Source:MGI Symbol;Acc:MGI:106180]                          |
| ENSMUSG00000032086 | Bace1   | 3.764910667 | 10.82934667 | -1.52425867  | 1.29E-15    | 1.27E-13    | down | beta-site APP cleaving enzyme 1 [Source:MGI Symbol;Acc:MGI:1346542]                                                       |
| ENSMUSG00000031119 | Gpc4    | 2.554802    | 7.352536    | -1.525030458 | 1.61E-07    | 3.71E-06    | down | glypican 4 [Source:MGI Symbol;Acc:MGI:104902]                                                                             |
| ENSMUSG00000009614 | Sardh   | 10.78797033 | 31.19081    | -1.53169756  | 5.16E-13    | 3.61E-11    | down | sarcosine dehydrogenase [Source:MGI Symbol;Acc:MGI:2183102]                                                               |
| ENSMUSG00000094800 | Gm9780  | 6.578054333 | 19.10349067 | -1.538103448 | 1.65E-11    | 9.17E-10    | down | predicted gene 9780 [Source:MGI Symbol;Acc:MGI:3710532]                                                                   |
| ENSMUSG00000023963 | Cyp39a1 | 3.012012    | 8.816745333 | -1.549518671 | 2.24E-13    | 1.70E-11    | down | cytochrome P450, family 39, subfamily a, polypeptide 1 [Source:MGI Symbol;Acc:MGI:1927096]                                |
| ENSMUSG00000028337 | Coro2a  | 1.873315333 | 5.525499667 | -1.560511165 | 1.78E-08    | 5.22E-07    | down | coronin, actin binding protein 2A [Source:MGI Symbol;Acc:MGI:1345966]                                                     |
| ENSMUSG00000023092 | Fhl1    | 10.64605567 | 31.57729267 | -1.56856847  | 1.18E-10    | 5.66E-09    | down | four and a half LIM domains 1 [Source:MGI Symbol;Acc:MGI:1298387]                                                         |
| ENSMUSG00000020334 | Slc22a4 | 2.182596667 | 6.538289667 | -1.582867743 | 8.31E-08    | 2.06E-06    | down | solute carrier family 22 (organic cation transporter), member 4 [Source:MGI Symbol;Acc:MGI:1353479]                       |
| ENSMUSG00000072674 | Plac9b  | 9.828826333 | 29.47613867 | -1.584456487 | 2.04E-12    | 1.29E-10    | down | placenta specific 9b [Source:MGI Symbol;Acc:MGI:3711222]                                                                  |
| ENSMUSG00000037254 | Itih2   | 2.040668    | 6.126502333 | -1.586022177 | 8.15E-10    | 3.33E-08    | down | inter-alpha trypsin inhibitor, heavy chain 2 [Source:MGI Symbol;Acc:MGI:96619]                                            |
| ENSMUSG00000050370 | Ch25h   | 3.271623    | 9.952646333 | -1.605073667 | 1.72E-08    | 5.10E-07    | down | cholesterol 25-hydroxylase [Source:MGI Symbol;Acc:MGI:1333869]                                                            |
| ENSMUSG00000030849 | Fgfr2   | 4.862876333 | 14.849589   | -1.610541193 | 5.90E-23    | 1.10E-20    | down | fibroblast growth factor receptor 2 [Source:MGI Symbol;Acc:MGI:95523]                                                     |
| ENSMUSG00000057719 | Sh3rf2  | 4.073637667 | 12.514299   | -1.61918791  | 1.65E-10    | 7.65E-09    | down | SH3 domain containing ring finger 2 [Source:MGI Symbol;Acc:MGI:2444628]                                                   |
| ENSMUSG00000030760 | Acer3   | 3.124105667 | 9.625158667 | -1.623367073 | 0.000208192 | 0.001895862 | down | alkaline ceramidase 3 [Source:MGI Symbol;Acc:MGI:1913440]                                                                 |
| ENSMUSG00000037447 | Arid5a  | 5.096591    | 15.86479433 | -1.638224332 | 8.76E-06    | 0.000127514 | down | AT rich interactive domain 5A (MRF1-like) [Source:MGI Symbol;Acc:MGI:2443039]                                             |
| ENSMUSG00000004266 | Ptpn6   | 3.612240333 | 11.267274   | -1.641172725 | 1.39E-14    | 1.22E-12    | down | protein tyrosine phosphatase, non-receptor type 6 [Source:MGI Symbol;Acc:MGI:96055]                                       |
| ENSMUSG00000034656 | Caena1a | 4.761846667 | 15.089408   | -1.663943135 | 2.27E-33    | 7.27E-31    | down | calcium channel, voltage-dependent, P/Q type, alpha 1A subunit [Source:MGI Symbol;Acc:MGI:109482]                         |
| ENSMUSG00000027162 | Lin7c   | 2.484481667 | 7.896534333 | -1.66827472  | 2.65E-13    | 1.98E-11    | down | lin-7 homolog C (C. elegans) [Source:MGI Symbol;Acc:MGI:1330839]                                                          |
| ENSMUSG00000032313 | Tmem266 | 1.946644667 | 6.283904667 | -1.69067173  | 1.14E-11    | 6.54E-10    | down | transmembrane protein 266 [Source:MGI Symbol;Acc:MGI:2142980]                                                             |
| ENSMUSG00000036943 | Rab8b   | 2.700098667 | 8.744835333 | -1.695419091 | 1.90E-16    | 1.98E-14    | down | RAB8B, member RAS oncogene family [Source:MGI Symbol;Acc:MGI:2442982]                                                     |

|                     |          |             |             |              |             |             |      |                                                                                                                         |
|---------------------|----------|-------------|-------------|--------------|-------------|-------------|------|-------------------------------------------------------------------------------------------------------------------------|
| ENSMUSG00000002107  | Celf2    | 2.088720667 | 6.765162    | -1.695504914 | 1.35E-09    | 5.19E-08    | down | CUGBP, Elav-like family member 2 [Source:MGI Symbol;Acc:MGI:1338822]                                                    |
| ENSMUSG000000078202 | Nrarp    | 2.617495667 | 8.578042    | -1.712461231 | 5.74E-14    | 4.52E-12    | down | Notch-regulated ankyrin repeat protein [Source:MGI Symbol;Acc:MGI:1914372]                                              |
| ENSMUSG000000020467 | Efemp1   | 6.475843333 | 21.268201   | -1.715558017 | 4.01E-20    | 6.04E-18    | down | epidermal growth factor-containing fibulin-like extracellular matrix protein 1 [Source:MGI Symbol;Acc:MGI:1339998]      |
| ENSMUSG000000026131 | Dst      | 2.193422667 | 7.240614    | -1.7229282   | 1.04E-06    | 1.94E-05    | down | dystonin [Source:MGI Symbol;Acc:MGI:104627]                                                                             |
| ENSMUSG00000019866  | Aim1     | 4.193531667 | 13.891706   | -1.727986128 | 1.12E-22    | 2.07E-20    | down | crystallin beta-gamma domain containing 1 [Source:MGI Symbol;Acc:MGI:109544]                                            |
| ENSMUSG000000078429 | Ctdsp2   | 38.12357833 | 129.215693  | -1.761025849 | 0.008348351 | 0.037000948 | down | CTD (carboxy-terminal domain, RNA polymerase II, polypeptide A) small phosphatase 2 [Source:MGI Symbol;Acc:MGI:1098748] |
| ENSMUSG000000038301 | Snx10    | 1.697869333 | 5.777878333 | -1.76681439  | 5.05E-09    | 1.71E-07    | down | sorting nexin 10 [Source:MGI Symbol;Acc:MGI:1919232]                                                                    |
| ENSMUSG000000022598 | Psea     | 4.223866    | 14.43340867 | -1.772776082 | 6.11E-10    | 2.54E-08    | down | prostate stem cell antigen [Source:MGI Symbol;Acc:MGI:1919623]                                                          |
| ENSMUSG000000063011 | Msln     | 44.737292   | 154.1856077 | -1.785118268 | 1.69E-37    | 6.17E-35    | down | mesothelin [Source:MGI Symbol;Acc:MGI:1888992]                                                                          |
| ENSMUSG000000041351 | Rap1gap  | 1.794464667 | 6.238170333 | -1.79756943  | 3.59E-06    | 5.80E-05    | down | Rap1 GTPase-activating protein [Source:MGI Symbol;Acc:MGI:109338]                                                       |
| ENSMUSG000000027111 | Itga6    | 1.601452    | 5.599344    | -1.805877259 | 1.23E-10    | 5.85E-09    | down | integrin alpha 6 [Source:MGI Symbol;Acc:MGI:96605]                                                                      |
| ENSMUSG000000052485 | Tmem171  | 2.23297     | 7.814072333 | -1.807110742 | 4.36E-09    | 1.51E-07    | down | transmembrane protein 171 [Source:MGI Symbol;Acc:MGI:2685751]                                                           |
| ENSMUSG000000031673 | Cdh11    | 1.674723667 | 5.929943667 | -1.824095332 | 3.19E-21    | 5.44E-19    | down | cadherin 11 [Source:MGI Symbol;Acc:MGI:99217]                                                                           |
| ENSMUSG000000057315 | Arhgap24 | 4.143917    | 14.914295   | -1.847628771 | 1.02E-20    | 1.61E-18    | down | Rho GTPase activating protein 24 [Source:MGI Symbol;Acc:MGI:1922647]                                                    |
| ENSMUSG000000025407 | Gli1     | 2.268811667 | 8.182043667 | -1.85052438  | 1.20E-15    | 1.21E-13    | down | GLI-Kruppel family member GLI1 [Source:MGI Symbol;Acc:MGI:95727]                                                        |
| ENSMUSG000000050368 | Hoxd10   | 1.523004333 | 5.754278667 | -1.917715043 | 5.12E-09    | 1.73E-07    | down | homeobox D10 [Source:MGI Symbol;Acc:MGI:96202]                                                                          |
| ENSMUSG000000042367 | Gjb3     | 30.55394367 | 116.303093  | -1.928458956 | 4.72E-26    | 1.06E-23    | down | gap junction protein, beta 3 [Source:MGI Symbol;Acc:MGI:95721]                                                          |
| ENSMUSG000000027684 | Mecom    | 2.237182333 | 8.693591667 | -1.958269492 | 3.10E-19    | 4.54E-17    | down | MDS1 and EVI1 complex locus [Source:MGI Symbol;Acc:MGI:95457]                                                           |
| ENSMUSG000000035847 | Ids      | 4.691520667 | 18.345005   | -1.967259772 | 2.64E-32    | 7.82E-30    | down | iduronate 2-sulfatase [Source:MGI Symbol;Acc:MGI:96417]                                                                 |
| ENSMUSG000000025473 | Adam8    | 8.226755333 | 33.40830667 | -2.021811417 | 1.74E-37    | 6.19E-35    | down | a disintegrin and metallopeptidase domain 8 [Source:MGI Symbol;Acc:MGI:107825]                                          |
| ENSMUSG000000058420 | Syt17    | 1.363198667 | 5.638685667 | -2.048363091 | 5.71E-14    | 4.52E-12    | down | synaptotagmin XVII [Source:MGI Symbol;Acc:MGI:104966]                                                                   |
| ENSMUSG000000056870 | Gulp1    | 1.232578    | 5.270154667 | -2.096166356 | 1.45E-09    | 5.55E-08    | down | GULP, engulfment adaptor PTB domain containing 1 [Source:MGI Symbol;Acc:MGI:1920407]                                    |
| ENSMUSG000000001819 | Hoxd13   | 15.77083167 | 69.723545   | -2.144387181 | 1.78E-44    | 9.62E-42    | down | homeobox D13 [Source:MGI Symbol;Acc:MGI:96205]                                                                          |
| ENSMUSG000000042357 | Gjb5     | 1.138676    | 5.201166333 | -2.191477877 | 7.90E-09    | 2.54E-07    | down | gap junction protein, beta 5 [Source:MGI Symbol;Acc:MGI:95723]                                                          |
| ENSMUSG000000032036 | Kirrel3  | 1.50192     | 6.893572333 | -2.198443829 | 1.75E-18    | 2.30E-16    | down | kirre like nephrin family adhesion molecule 3 [Source:MGI Symbol;Acc:MGI:1914953]                                       |
| ENSMUSG000000045954 | Sdpr     | 4.059399667 | 20.35699967 | -2.326186652 | 3.18E-26    | 7.32E-24    | down | caveolae associated 2 [Source:MGI Symbol;Acc:MGI:99513]                                                                 |
| ENSMUSG000000022464 | Slc38a4  | 2.318215333 | 11.69445    | -2.334737526 | 1.81E-27    | 4.38E-25    | down | solute carrier family 38, member 4 [Source:MGI Symbol;Acc:MGI:1916604]                                                  |
| ENSMUSG000000044037 | Als2cl   | 2.619264    | 14.16704367 | -2.435305349 | 2.42E-44    | 1.23E-41    | down | ALS2 C-terminal like [Source:MGI Symbol;Acc:MGI:2447532]                                                                |
| ENSMUSG000000029304 | Spp1     | 25.24436633 | 141.44871   | -2.48624565  | 1.17E-48    | 8.70E-46    | down | secreted phosphoprotein 1 [Source:MGI Symbol;Acc:MGI:98389]                                                             |
| ENSMUSG000000023019 | Gpd1     | 1.384984    | 8.090656333 | -2.546387433 | 7.28E-30    | 1.90E-27    | down | glycerol-3-phosphate dehydrogenase 1 (soluble) [Source:MGI Symbol;Acc:MGI:95679]                                        |



|                    |          |             |             |              |             |             |      |                                                                                             |
|--------------------|----------|-------------|-------------|--------------|-------------|-------------|------|---------------------------------------------------------------------------------------------|
| ENSMUSG00000110537 | Gm4316   | 3.618143667 | 23.78678333 | -2.716838591 | 7.28E-28    | 1.78E-25    | down | predicted gene 4316 [Source:MGI Symbol;Acc:MGI:3782497]                                     |
| ENSMUSG00000055805 | Fmnl1    | 1.546641333 | 10.21169267 | -2.723011445 | 7.88E-33    | 2.37E-30    | down | formin-like 1 [Source:MGI Symbol;Acc:MGI:1888994]                                           |
| ENSMUSG00000028545 | Bend5    | 0.987886    | 7.006658    | -2.826310006 | 2.33E-14    | 1.99E-12    | down | BEN domain containing 5 [Source:MGI Symbol;Acc:MGI:1914871]                                 |
| ENSMUSG00000063651 | Cnfn     | 1.994726333 | 14.63205633 | -2.8748698   | 1.68E-11    | 9.31E-10    | down | cornifelin [Source:MGI Symbol;Acc:MGI:1919633]                                              |
| ENSMUSG00000030693 | Klk10    | 3.073782333 | 23.70496767 | -2.947102514 | 2.87E-32    | 8.34E-30    | down | kallikrein related-peptidase 10 [Source:MGI Symbol;Acc:MGI:1916790]                         |
| ENSMUSG00000049404 | Rarres1  | 0.922242667 | 7.365505333 | -2.997566192 | 5.95E-13    | 4.12E-11    | down | retinoic acid receptor responder (tazarotene induced) 1 [Source:MGI Symbol;Acc:MGI:1924461] |
| ENSMUSG00000113949 | Scamp4   | 11.11290233 | 95.784621   | -3.107558387 | 0.000816328 | 0.005768034 | down | secretory carrier membrane protein 4 [Source:MGI Symbol;Acc:MGI:1928947]                    |
| ENSMUSG00000051669 | AU021092 | 1.717935    | 16.61772033 | -3.273975126 | 1.67E-29    | 4.29E-27    | down | expressed sequence AU021092 [Source:MGI Symbol;Acc:MGI:2146559]                             |
| ENSMUSG00000081375 | Gm14686  | 0.255788    | 5.757121333 | -4.492327129 | 6.81E-05    | 0.000725617 | down | predicted gene 14686 [Source:MGI Symbol;Acc:MGI:3712656]                                    |
| ENSMUSG00000019139 | Isyna1   | 0.820866    | 19.644575   | -4.580840414 | 1.19E-67    | 2.07E-64    | down | myo-inositol 1-phosphate synthase A1 [Source:MGI Symbol;Acc:MGI:1919030]                    |
| ENSMUSG00000028989 | Angptl7  | 1.515355667 | 40.32624133 | -4.733990592 | 2.94E-107   | 1.54E-103   | down | angiopoietin-like 7 [Source:MGI Symbol;Acc:MGI:3605801]                                     |
| ENSMUSG00000103081 | Pcdhgb8  | 0.287187667 | 9.295489667 | -5.016465166 | 0.001886659 | 0.011482609 | down | protocadherin gamma subfamily B, 8 [Source:MGI Symbol;Acc:MGI:1935200]                      |
| ENSMUSG00000074846 | Gm10774  | 0.104929333 | 9.254638    | -6.46268661  | 2.83E-05    | 0.000349314 | down | predicted pseudogene 10774 [Source:MGI Symbol;Acc:MGI:3642325]                              |
| ENSMUSG00000065388 | Gm23099  | 0.0001      | 6.549475    | -15.99909165 | 9.83E-06    | 0.000140124 | down | predicted gene, 23099 [Source:MGI Symbol;Acc:MGI:5452876]                                   |
| ENSMUSG00000110104 | Gm45717  | 0.0001      | 518.3187257 | -22.30540809 | 9.03E-13    | 6.13E-11    | down | predicted gene 45717 [Source:MGI Symbol;Acc:MGI:5804832]                                    |

DEGseq was performed for determining differential expression genes, and threshold with q-Value < 0.05 and absolute values of |log<sub>2</sub>(fold change)| > 1. The details of DEGs are listed, including some parameters, such as: ensembl Gene ID, Gene Symbol, MeanTPM (mean transcripts per million) (NF639R), MeanTPM (NF639), log<sub>2</sub>FoldChange, P value, q-value, Result (up or down), Gene Description, etc.
